# Supplementary material for: Re-creation of a Key Step in the Evolutionary Switch from C3 to C4 Leaf Anatomy
Source: PubMed Central journal article supplement (PMC5678070; doi:10.1016/j.cub.2017.09.040), 2017-11-06
Supplement: mmc2.pdf [file mmc2.pdf]

# Current Biology

## Re-creation of a Key Step in the Evolutionary Switch from C<sub>3</sub> to C<sub>4</sub> Leaf Anatomy

### Highlights

- Organelle development in rice vascular sheath cells is induced by maize *GLK* genes
- Cells with activated organelles form more plasmodesmatal connections than wild-type
- *GLK*-induced anatomy mimics a key step in the evolutionary transition from C<sub>3</sub> to C<sub>4</sub>
- The intermediate proto-Kranz leaf anatomy appears to bear no fitness cost in rice

### Authors

Peng Wang, Roxana Khoshravesh, Shanta Karki, ..., Robert Furbank, Tammy L. Sage, Jane A. Langdale

### Correspondence

tammy.sage@utoronto.ca (T.L.S.), jane.langdale@plants.ox.ac.uk (J.A.L.)

### In Brief

Wang et al. report that constitutive expression of maize *GOLDEN2-like* genes induces a suite of traits in C<sub>3</sub> rice leaves that is reminiscent of proto-Kranz anatomy, an intermediate state in the evolutionary trajectory from C<sub>3</sub> to C<sub>4</sub>. A key step toward engineering C<sub>4</sub> rice has thus been achieved.

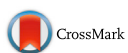

# Re-creation of a Key Step in the Evolutionary Switch from C<sub>3</sub> to C<sub>4</sub> Leaf Anatomy

Peng Wang,<sup>1,9</sup> Roxana Khoshravesh,<sup>2,9</sup> Shanta Karki,<sup>3,7,9</sup> Ronald Tapia,<sup>3,8</sup> C. Paolo Balahadia,<sup>3</sup> Anindya Bandyopadhyay,<sup>3</sup> W. Paul Quick,<sup>3,4</sup> Robert Furbank,<sup>5,6</sup> Tammy L. Sage,<sup>2,\*</sup> and Jane A. Langdale<sup>1,10,\*</sup>

<sup>1</sup>Department of Plant Sciences, University of Oxford, South Parks Road, Oxford OX1 3RB, UK

<sup>2</sup>Department of Ecology and Evolutionary Biology, University of Toronto, Toronto, ON M5S3B2, Canada

<sup>3</sup>International Rice Research Institute (IRRI), Los Banos 4030, Laguna, the Philippines

<sup>4</sup>Department of Animal and Plant Sciences, University of Sheffield, Sheffield S10 2TN, UK

<sup>5</sup>CSIRO, Canberra, ACT 2601, Australia

<sup>6</sup>ARC Centre of Excellence for Translational Photosynthesis, Research School of Biology, Australian National University, Acton, ACT 2601, Australia

<sup>7</sup>Present address: Ministry of Agricultural Development, Government of Nepal, Singhadurbar, Kathmandu, Nepal

<sup>8</sup>Present address: Department of Horticultural Science, University of Florida, IFAS Gulf Coast Research and Education Center, 14625 CR 672, Wimauma, FL 33598, USA

<sup>9</sup>These authors contributed equally

<sup>10</sup>Lead Contact

\*Correspondence: [tammy.sage@utoronto.ca](mailto:tammy.sage@utoronto.ca) (T.L.S.), [jane.langdale@plants.ox.ac.uk](mailto:jane.langdale@plants.ox.ac.uk) (J.A.L.)

<https://doi.org/10.1016/j.cub.2017.09.040>

## SUMMARY

The C<sub>4</sub> photosynthetic pathway accounts for ~25% of primary productivity on the planet despite being used by only 3% of species. Because C<sub>4</sub> plants are higher yielding than C<sub>3</sub> plants, efforts are underway to introduce the C<sub>4</sub> pathway into the C<sub>3</sub> crop rice. This is an ambitious endeavor; however, the C<sub>4</sub> pathway evolved from C<sub>3</sub> on multiple independent occasions over the last 30 million years, and steps along the trajectory are evident in extant species. One approach toward engineering C<sub>4</sub> rice is to recapitulate this trajectory, one of the first steps of which was a change in leaf anatomy. The transition from C<sub>3</sub> to so-called “proto-Kranz” anatomy requires an increase in organelle volume in sheath cells surrounding leaf veins. Here we induced chloroplast and mitochondrial development in rice vascular sheath cells through constitutive expression of maize *GOLDEN2-LIKE* genes. Increased organelle volume was accompanied by the accumulation of photosynthetic enzymes and by increased intercellular connections. This suite of traits reflects that seen in “proto-Kranz” species, and, as such, a key step toward engineering C<sub>4</sub> rice has been achieved.

## INTRODUCTION

The C<sub>4</sub> photosynthetic pathway evolved over 60 times independently in a diverse range of flowering plant species, with trajectories from C<sub>3</sub> to C<sub>4</sub> apparent in a number of lineages [1]. In most C<sub>4</sub> plants, photosynthetic reactions are compartmentalized between two cell types that are arranged in concentric

wreaths around closely spaced veins. This cellular arrangement, which is referred to as Kranz anatomy [2, 3], facilitates initial fixation of carbon dioxide in the outer mesophyll cells followed by decarboxylation and refixation by ribulose biphosphate carboxylase/oxygenase (RuBisCo) in the CO<sub>2</sub>-enriched environment of the inner sheath cells (reviewed in [4]). In most C<sub>4</sub> species, the bundle sheath cells surrounding the vein are the site of refixation, but in some grasses an inner layer of mestome sheath cells with thick suberized cell walls play this role (either instead of [5] or in addition to [6, 7] the bundle sheath cells). A critical step in the evolution of C<sub>4</sub> was thus the functionalization of bundle sheath and/or mestome sheath cells for photosynthesis (reviewed in [8, 9]).

A long-term project is underway to introduce the C<sub>4</sub> pathway into the C<sub>3</sub> crop rice, with predictions of up to a 50% yield increase if successful [10, 11] (<https://c4rice.com>). One of the major challenges in this regard is the need to introduce Kranz anatomy into the rice leaf. Morphological analyses of extant species suggest that Kranz evolved in a stepwise fashion, with “proto-Kranz”- and “C<sub>2</sub>”- type anatomies representing intermediate steps along the C<sub>3</sub>-to-C<sub>4</sub> trajectory [9]. In both monocots [12] and eudicots [13–16], proto-Kranz anatomy is characterized by increased organelle volume in the bundle sheath and/or mestome sheath cells around the leaf vasculature (collectively referred to as vascular sheath cells), with chloroplasts accumulating the photosynthetic enzyme RuBisCo and mitochondria accumulating the photorespiratory enzyme glycine decarboxylase. In the grasses, proto-Kranz species exist in the “PACMAD” clade, in which 24 independent origins of C<sub>4</sub> have been identified [1, 12, 17, 18]. By contrast, there are no proto-Kranz or C<sub>4</sub> species in the sister clade, to which rice belongs. As such, a rational first step toward engineering C<sub>4</sub> rice is to induce proto-Kranz by activating chloroplast and mitochondrial biogenesis in vascular sheath cells.

GOLDEN2-like (GLK) transcription factors regulate chloroplast development in all land plant species examined [19–25], and

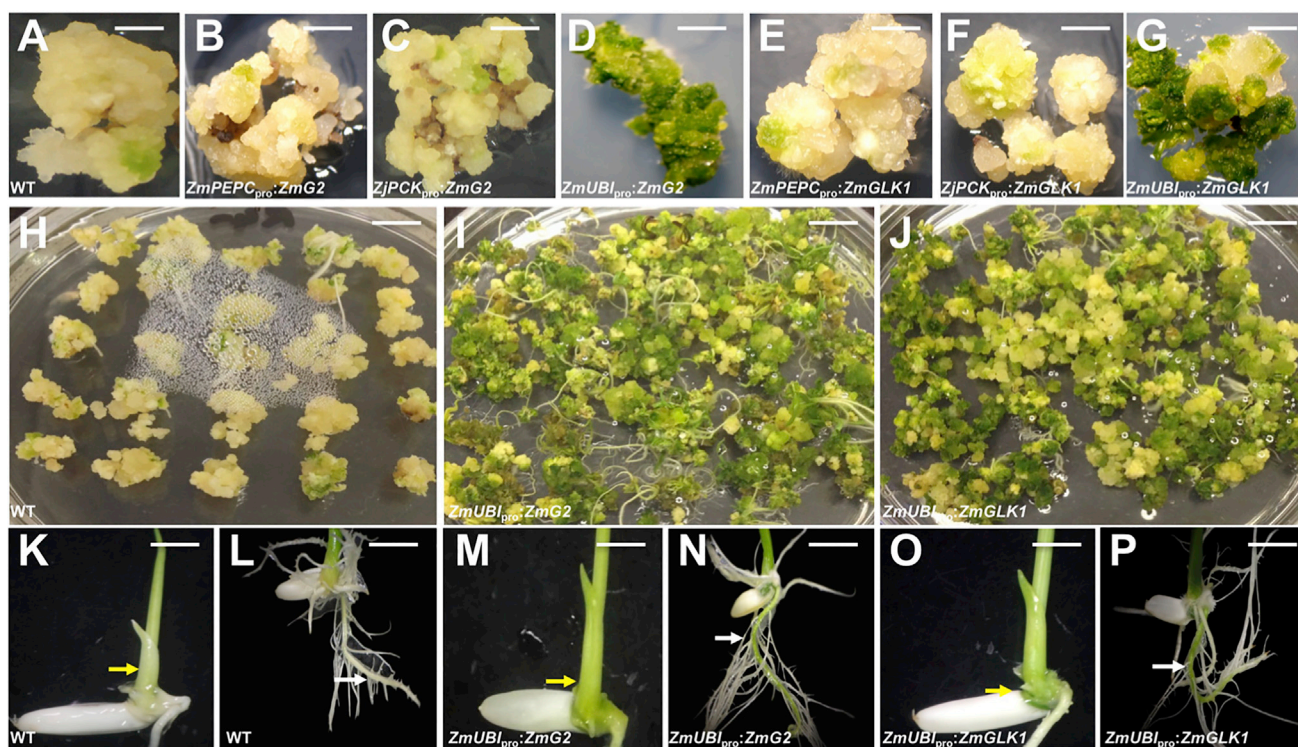

**Figure 1. Constitutive Expression of *ZmG2* or *ZmGLK1* Leads to Enhanced Greening of Regenerating Callus and T1 Seedlings**

(A–G) Representative regenerating callus of T0 cultivar IR64 lines: wild-type (WT) (A), *ZmPEPC<sub>pro</sub>:ZmG2* (B), *ZJPCK<sub>pro</sub>:ZmG2* (C), *ZmUBI<sub>pro</sub>:ZmG2* (D), *ZmPEPC<sub>pro</sub>:ZmGLK1* (E), *ZJPCK<sub>pro</sub>:ZmGLK1* (F), and *ZmUBI<sub>pro</sub>:ZmGLK1* (G).

(H–J) Representative regenerating callus of T0 cultivar Kitaake lines on cytokinin-containing media: WT (H), *ZmUBI<sub>pro</sub>:ZmG2* (I), and *ZmUBI<sub>pro</sub>:ZmGLK1* (J).

(K–P) Representative T1 seedling shoots (K, M, and O) and roots (L, N, and P) of IR64 lines: WT (K and L), *ZmUBI<sub>pro</sub>:ZmG2* (M and N), and *ZmUBI<sub>pro</sub>:ZmGLK1* (O and P). Yellow arrows indicate hypocotyl, white arrows indicate primary root.

Scale bars, 0.5 cm (A–G), 0.8 cm (H–J, L, N, and P), and 0.2 cm (K, M, and O). See also [Figure S1](#) and [Table S1](#).

ectopic expression of *OsGLK1* activates chloroplast biogenesis in rice vascular sheath cells [26]. However, enhanced chloroplast development in overexpression lines is not sustained beyond the seedling stage [26], suggesting that ectopic *OsGLK1* activity is suppressed by one of the post-transcriptional mechanisms that balance GLK-induced chloroplast development with leaf senescence [27–29]. On the basis of these findings, we postulated that sustained chloroplast development in the vascular sheath cells of rice might be achieved through the introduction of one of the two heterologous maize *GLK* genes (either *ZmG2* or *ZmGLK1* [20]). Here we validate that hypothesis and further demonstrate that enhanced chloroplast development leads to enhanced mitochondrial biogenesis, with both types of organelle accumulating metabolic enzymes. A proto-Kranz rice line has thus been generated.

## RESULTS

### Constitutive Expression of *ZmG2* or *ZmGLK1* in Rice Induces Greening of Callus and Roots

To determine whether maize *GLK* gene function is sufficient to promote enhanced chloroplast development in rice, *ZmG2* or *ZmGLK1* transgenes were introduced under the control of constitutive or cell type preferential promoters.

The maize *UBIQUITIN* promoter (*ZmUBI<sub>pro</sub>*) was used to drive constitutive expression [30], the *Zoysia japonica* *PHOSPHOENOLPYRUVATE CARBOXYKINASE* promoter (*ZJPCK<sub>pro</sub>*) for preferential expression in bundle sheath cells [31], and the maize *PHOSPHOENOLPYRUVATE CARBOXYLASE* promoter (*ZmPEPC<sub>pro</sub>*) for preferential expression in mesophyll cells [32]. Constructs were transformed into both *Oryza sativa* spp. *indica* cultivar IR64 and spp. *japonica* cultivar Kitaake (Figure S1; Table S1). A phenotypic consequence of constitutive expression was immediately apparent in that transgenic calli were green, whereas wild-type calli and those transformed with cell type preferential promoter constructs remained yellow (Figures 1A–1G). The green calli were generated solely in the presence of the auxin analog 2,4-D, bypassing the requirement for cytokinin that is normally needed for greening of yellow callus. When cytokinin was added to the green calli, shoot regeneration occurred with a higher frequency than from wild-type callus (Figures 1H–1J). Embryos, shoots, and roots of germinating T1 seedlings that constitutively expressed *ZmG2* or *ZmGLK1* were also greener than wild-type (Figures 1K–1P). Constitutive expression of *ZmG2* or *ZmGLK1* in rice is, therefore, sufficient to induce greening in tissues where chloroplasts don't usually develop (callus, embryos, and roots) and to enhance greening in shoots.

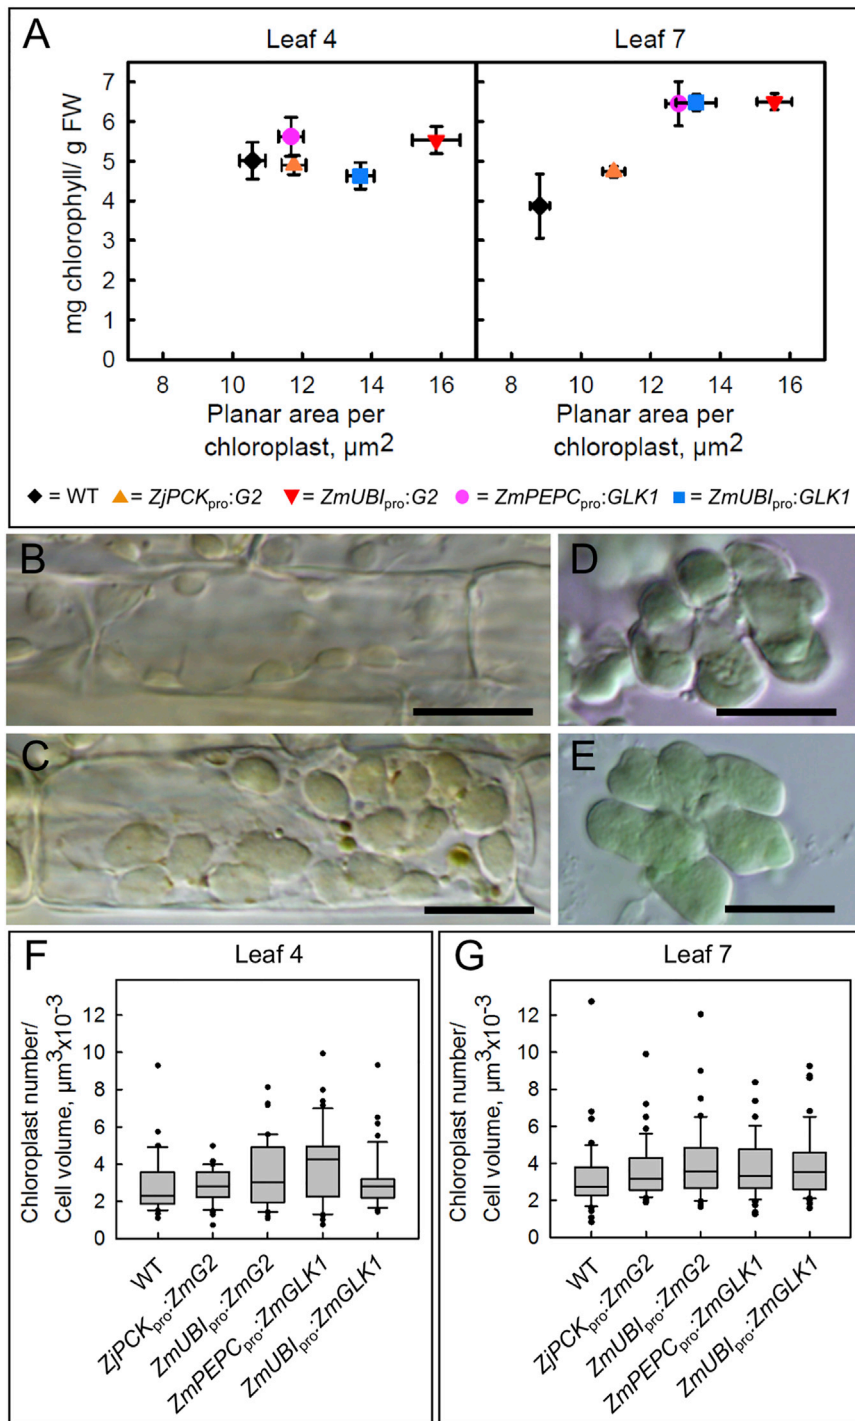

### Maize *GLK* Gene Expression Significantly Increases the Volume of Functional Chloroplasts in Both Bundle Sheath and Mesophyll Cells of Rice

The enhanced greening phenotype in transgenic rice lines expressing maize *GLK* genes could reflect increases in chloroplast size and/or number. To distinguish these possibilities, quantitative measurements were taken from the fourth and seventh leaves of cv. Kitaake lines that either constitutively expressed

was driven by the constitutive *ZmUBI<sub>pro</sub>* or the mesophyll preferential *ZmPEPC<sub>pro</sub>*. This suggests either that the effect on bundle sheath chloroplast size was induced non-cell autonomously or that the *ZmPEPC<sub>pro</sub>* drove enough gene expression in the bundle sheath cells to have a phenotypic effect. Given that *GLK* proteins are known to act cell autonomously in *Arabidopsis* [33], it is most likely that the *ZmPEPC<sub>pro</sub>* drives gene expression in rice bundle sheath cells but that transcript levels are so low that promoter

### Figure 2. Chloroplast Size, but Not Number, Is Increased in Bundle Sheath Cells of *ZmG2* and *ZmGLK1* Overexpression Lines

(A) Relationship between total leaf chlorophyll content and chloroplast planar area in bundle sheath cells of wild-type (WT) and T1 transgenic lines. Values are mean  $\pm$  SEM ( $n = 3$  individuals for chlorophyll content;  $n = 45$  cells [15 cells/3 individuals] for chloroplast area). Chloroplast size was significantly increased in leaf 7 of all four transgenic lines relative to WT and in leaf 4 of lines constitutively expressing *ZmG2* or *ZmGLK1* (by a Games-Howell test of variance,  $p < 0.05$ ). The phenotypic consequences of relatively weak transgene expression from the BS-preferential *ZjPCK<sub>pro</sub>* were less dramatic than with the constitutive promoters.

(B–E) Representative bundle sheath (B and C) and mesophyll (D and E) cells from WT (B and D) and *ZmUBI<sub>pro</sub>:ZmG2* (C and E) lines. Scale bars, 10  $\mu\text{m}$ .

(F and G) Boxplots showing chloroplast numbers in bundle sheath cells of leaf 4 (F) and leaf 7 (G) ( $n = 45$  cells [15 cells from each of 3 individuals representing at least two independent lines] in each case). Boxplot whiskers indicate the range of observations.

See Table S1 for details of transgenic lines used, Figure S1 for transgene copy number analysis, Figure S2 for transgene transcript levels, and Table S2 for a complete set of measurements.

*ZmG2* or *ZmGLK1* or mimicked the expression profile observed in maize (namely, *ZmG2* expression preferentially in bundle sheath cells and *ZmGLK1* expression preferentially in mesophyll cells). Individual leaf samples were first analyzed for total chlorophyll levels (Figure 2A) and for both transgene and endogenous *OsGLK1/2* transcript levels (Figure S2). Both chloroplast size and number were then measured in bundle sheath cells that were isolated from the same leaves (Figure 2; Table S2). Chloroplast size was significantly increased in bundle sheath cells relative to wild-type at both stages of development and when either *ZmG2* or *ZmGLK1* was constitutively expressed (Figures 2A–2E; Table S2). Intriguingly the size increase induced by *ZmGLK1* was manifest regardless of whether gene expression

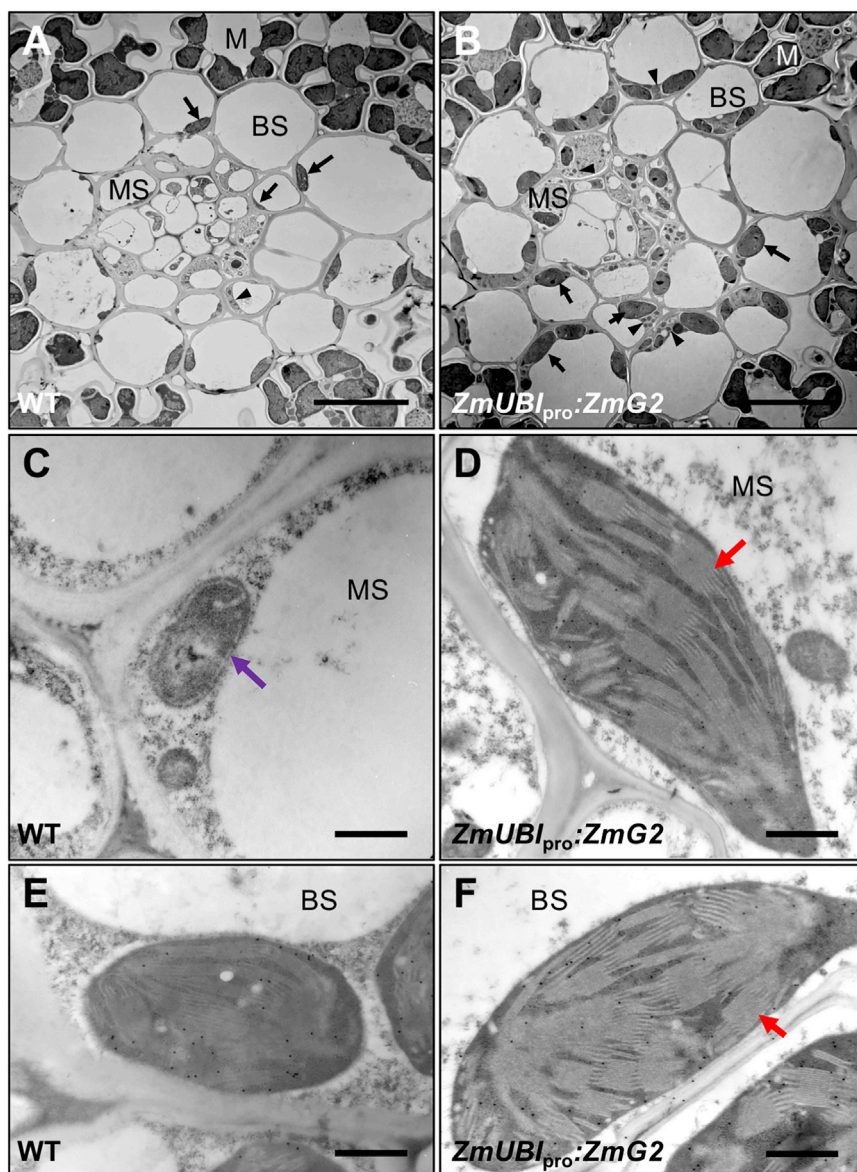

**Figure 3. Chloroplasts in Both Bundle Sheath and Mestome Sheath Cells of Lines that Constitutively Express *ZmG2* Accumulate Photosynthetic Enzymes**

(A and B) Transmission electron micrographs of minor veins in leaf 7 of wild-type (WT) (A) and *ZmUbi<sub>pro</sub>:ZmG2* transgenic (B) plants grown at 300  $\mu\text{mol photons m}^{-2} \text{s}^{-1}$ . The position of bundle sheath (BS), mestome sheath (MS), and mesophyll (M) cells is indicated, with arrows pointing to representative chloroplasts and arrowheads pointing to mitochondria in each cell type.

(C–F) Transmission electron micrographs of WT (C and E) and *ZmUbi<sub>pro</sub>:ZmG2* transgenic (D and F) lines showing plastid ultrastructure and immunogold labeling with RuBisCo antibody in MS (C and D) and BS (E and F) cells. Purple arrow, proplastid; red arrows, organized thylakoid stacks.

Scale bars, 2  $\mu\text{m}$  (A and B) and 500 nm (C–F). See Table 1 for quantification of immunogold labeling and Figure S3 for immuno-labeling with additional enzymes. See also Figures S1 and S2 and Tables S1 and S3.

in mestome sheath chloroplasts of *ZmUbi<sub>pro</sub>:ZmG2* leaves (Figure 3D), with the area of chloroplast coverage per cell being equivalent to that seen in the bundle sheath cells (Table S3). Mesophyll cell chloroplast size was indistinguishable between wild-type and transgenic lines (Table S3). To determine whether enhanced chloroplast development in vascular sheath cells was accompanied by the accumulation of photosynthetic enzymes, antibodies against RuBisCo, RuBisCo activase, and fructose-1,6-bisphosphatase were reacted with tissue sections. Notably, all three enzymes could be detected in both bundle sheath and mestome sheath chloroplasts of *ZmUbi<sub>pro</sub>:ZmG2* transgenic plants (Figures 3C–3F; Figure S3), with levels in

activity has not been detected in previous reporter gene assays [32]. Quantification of chloroplast numbers per bundle sheath cell and of bundle sheath cell volume revealed no statistical difference between wild-type and any of the transgenic lines (Figures 2F and 2G; Table S2). Enhanced greening in transgenic lines is thus associated with an increase in chloroplast size that is unaccompanied by a decrease in chloroplast number, resulting in a larger chloroplast volume per bundle sheath cell relative to wild-type.

Transmission electron microscopy (TEM) of leaf sections from wild-type (Figure 3A) and *ZmUbi<sub>pro</sub>:ZmG2* transgenic (Figure 3B) lines confirmed that bundle sheath chloroplast volume is increased when *ZmG2* is expressed and revealed a similar distinction in mestome sheath cells (Figures 3A and 3B; Table S2). In wild-type leaves, only small undifferentiated plastids (proplastids) are found in mestome sheath cells (Figure 3C), but highly organized thylakoid systems were apparent

in mestome sheath cells of *ZmUbi<sub>pro</sub>:ZmG2* leaves (Figure 3D), with the area of chloroplast coverage per cell being equivalent to that seen in the bundle sheath cells (Table S3). Mesophyll cell chloroplast size was indistinguishable between wild-type and transgenic lines (Table S3). To determine whether enhanced chloroplast development in vascular sheath cells was accompanied by the accumulation of photosynthetic enzymes, antibodies against RuBisCo, RuBisCo activase, and fructose-1,6-bisphosphatase were reacted with tissue sections. Notably, all three enzymes could be detected in both bundle sheath and mestome sheath chloroplasts of *ZmUbi<sub>pro</sub>:ZmG2* transgenic plants (Figures 3C–3F; Figure S3), with levels in

#### GLK-Induced Chloroplast Development in Rice Vascular Sheath Cells Is Accompanied by Enhanced Biogenesis of Mitochondria and Plasmodesmata

Qualitative analysis of TEM sections indicated that mitochondrial size and the frequency of plasmodesmata between cells were both increased in bundle sheath and mestome sheath cells of transgenic lines that constitutively expressed *ZmG2* (Figures 4A–4D). Quantification of mitochondrial size confirmed this suggestion and also demonstrated that mitochondrial number did not differ between wild-type and transgenic lines (Figure 4E; Tables S3 and S4). As with chloroplasts, the significant increase in mitochondrial volume represented enhanced functional

**Table 1. Quantification of Photosynthetic Enzymes in Vascular Sheath Cells**

| Cell Type | Transgene                       | Density of Gold Labeling/Planar Chloroplast Area ( $\mu\text{m}^{-2}$ ) |                  | Density of Gold Labeling/Planar Cell Area ( $\mu\text{m}^{-2}$ ) |                  |
|-----------|---------------------------------|-------------------------------------------------------------------------|------------------|------------------------------------------------------------------|------------------|
|           |                                 | RuBisCo                                                                 | RuBisCo Activase | RuBisCo                                                          | RuBisCo Activase |
| BS        | WT                              | 14.3 $\pm$ 0.6                                                          | 52.4 $\pm$ 2.2   | 0.7 $\pm$ 0.1                                                    | 2.7 $\pm$ 0.5    |
| BS        | <i>ZmUBI<sub>pro</sub>:ZmG2</i> | 13.8 $\pm$ 0.5                                                          | 59.0 $\pm$ 2.3   | 1.9 $\pm$ 0.6                                                    | 7.7 $\pm$ 2.4    |
| MS        | WT                              | –                                                                       | –                | 0.0                                                              | 0.0              |
| MS        | <i>ZmUBI<sub>pro</sub>:ZmG2</i> | 14.0 $\pm$ 0.7                                                          | 64.2 $\pm$ 3.6   | 12.8 $\pm$ 3.7                                                   | 51.7 $\pm$ 10.2  |

Mean  $\pm$  SEM for 15 bundle sheath (BS) cells from leaf 7 of each of three transgenic *ZmUBI<sub>pro</sub>:ZmG2* individuals (representing 3 independent transgenic lines) and two wild-type (WT) individuals is given. The density of RuBisCo and RuBisCo activase is statistically similar per chloroplast planar area by a two-tailed t test ( $p \geq 0.05$ ). However, the significantly higher percentage of BS cell area covered by chloroplasts (Table S4;  $p < 0.05$ ) translates into a 2- to 3-fold increase in the density of RuBisCo and RuBisCo activase per BS cell in *ZmUBI<sub>pro</sub>:ZmG2* lines relative to WT. More substantial increases are observed in mestome sheath (MS) cells. See also Figures S2 and S3 and Table S3.

capacity, as evidenced by accumulation of the photorespiratory glycine decarboxylase (Figure S3). Plasmodesmatal junctions were also significantly increased, both between bundle sheath and mesophyll and between bundle sheath and mestome sheath cells (Table S4). Notably,  $C_4$  grasses also exhibit higher plasmodesmatal frequencies between bundle sheath and mesophyll cells than  $C_3$  relatives [34]. Collectively, these data suggest that *ZmG2* activity can induce both photosynthesis and photorespiration in rice vascular sheath cells and that functionalization leads to greater plasmodesmatal connectivity between cell types.

### The Anatomical Traits Induced by Constitutive *ZmG2* or *ZmGLK1* Expression in Rice Mimic Those Seen in Proto-Kranz Species

To assess the extent to which the vascular sheath cell phenotype of transgenic rice lines represents a transition along the  $C_3$ -to- $C_4$  trajectory, organelle composition was quantified in  $C_3$ , proto-Kranz, and  $C_2$  species of both grass and eudicot clades. In proto-Kranz species, 4%–9% of the chloroplast area in the leaf and 18%–32% of the mitochondrial area is invested in vascular sheath cells (bundle sheath plus mestome sheath), which in grasses represents a 2.7-fold (chloroplasts) and 2.5-fold (mitochondria) enhancement relative to  $C_3$  species in the same clade (Figure 5; Figure S4; Table S5). Similarly, *ZmUBI<sub>pro</sub>:ZmG2* and *ZmUBI<sub>pro</sub>:ZmGLK1* transgenic lines have 4%–6% of leaf chloroplast area and 21% of leaf mitochondrial area invested in vascular sheath cells, a 2.5- to 3-fold increase relative to wild-type (Figure 5; Table S5). As seen in other examples where  $C_3$  and proto-Kranz species have similar vascular sheath cell sizes (e.g., [14, 15]), increased organelle area in the transgenic rice lines was not associated with altered cell size. Collectively, these results demonstrate that cons-

titutive expression of either *ZmG2* or *ZmGLK1* is sufficient to induce proto-Kranz anatomy in rice, recapitulating one of the earliest steps in  $C_4$  evolution.

### Proto-Kranz Anatomy in Rice Bears No Fitness Cost

To determine whether the proto-Kranz anatomy that is induced by expression of *ZmG2* or *ZmGLK1* genes in rice has an impact at the whole-plant level, assays were conducted to measure photosynthetic efficiency and yield. These experiments were conducted in near-field conditions in the Philippines using cv. IR64 wild-type plus transgenic lines, in which expression from both constitutive and cell type preferential promoters had been confirmed (Figure S5). In all cases the transgenic lines resembled segregating wild-type plants in terms of gross morphology (e.g., plant height and tiller number) (Figures 6A–6C), and rates of leaf photosynthesis in response to both increased intercellular  $\text{CO}_2$  concentration (A/Ci curve) and increased photosynthetically active radiation (light response curve) were not significantly different from wild-type (Figures S6A and S6B). Similarly, the photosynthetic efficiency of photosystem II (Fv/Fm) (Figure S6C) and the non-photochemical quenching (NPQ) response (Figure S6D) were both similar to wild-type.

While the failure to detect altered rates of photosynthesis was initially surprising, the proportion of vascular sheath to mesophyll tissue is low in rice leaves (Table S5), and it is further likely that  $\text{CO}_2$  fixed in vascular sheath cells is sourced from respiration rather than from diffusion through mesophyll cells and intercellular air spaces [35]. Regardless, prolonged photosynthetic activity was evidenced by a significant delay in both heading date and time to harvesting physiologically matured seeds (Figure 6D) and by enhanced greening of immature grains (Figures 6E–6J). Whereas similar delayed senescence phenotypes can lead to reduced yield [36], no consistent differences in the yield of viable seed were observed between wild-type and transgenic lines (Figure 6D). As such, there is no fitness cost of proto-Kranz anatomy in rice.

### DISCUSSION

The evolutionary trajectory from  $C_3$  to  $C_4$  most likely occurred in a stepwise fashion, with the order of events differing between lineages [8, 16, 17, 37, 38]. Combined evidence from qualitative, quantitative, and modeling approaches suggests, however, that the unifying early step in all trajectories was the transition from  $C_3$  to proto-Kranz [9, 12, 14, 15]. To recapitulate this step, organellar volume and photosynthetic/photorespiratory enzyme content in sheath cells surrounding the leaf veins must be increased. Constitutive expression of maize *GLK* genes in rice caused ectopic chloroplast development in cells around the vascular bundle, with photosynthetic enzymes accumulating to elevated levels in both bundle sheath and mestome sheath cells (Figures 1, 2, and 3; Table 1; Figure S3; Tables S2 and S3). Activation of chloroplasts in these cell types was accompanied by an increase in mitochondrial size, a corresponding increase in levels of the photorespiratory enzyme glycine decarboxylase, and a higher frequency of plasmodesmatal connections with neighboring cells (Figure 4; Tables S3 and S4). These subcellular modifications did not alter

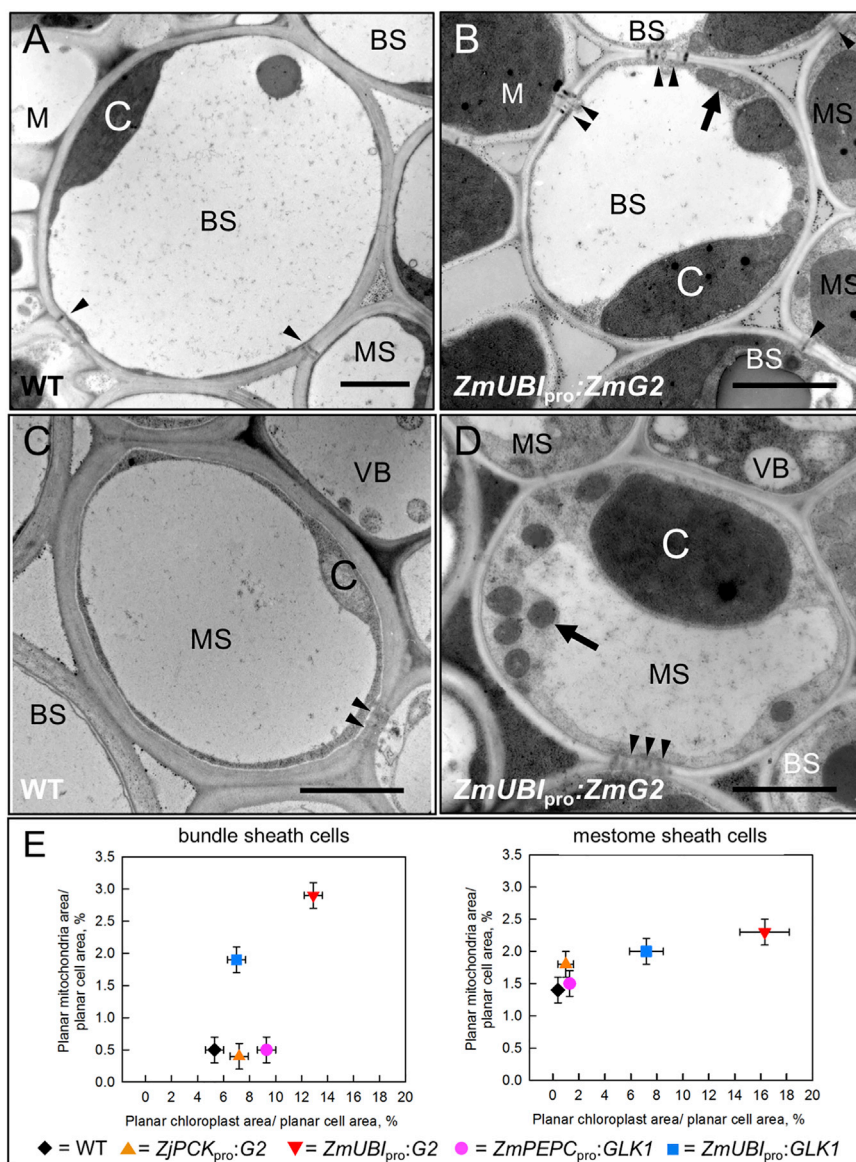

photosynthetic parameters in optimal growth conditions, and they did not impact on yield (Figure 6; Figure S6). In combination, these results demonstrate that constitutive expression of maize *GLK* genes in rice is sufficient to induce the transition from *C*<sub>3</sub> leaf anatomy to proto-Kranz (Figure 5) and that the transition bears no fitness cost.

*GLK* proteins are transcription factors that directly activate a large number of downstream target genes encoding chloroplast-localized or photosynthesis-related proteins [25]. The modified development of mitochondria and plasmodesmata in bundle sheath and mestome cells of *ZmGLK* overexpression lines, therefore, most likely occurred as an indirect consequence of activated chloroplast development. Several communication routes between chloroplasts and mitochondria have been proposed, with the best characterized being signaling via redox state (for example, [39–41]). A direct link between chloroplasts, mitochondria, and plasmodesmata has also been recognized

photosynthetic parameters in optimal growth conditions, and they did not impact on yield (Figure 6; Figure S6). In combination, these results demonstrate that constitutive expression of maize *GLK* genes in rice is sufficient to induce the transition from *C*<sub>3</sub> leaf anatomy to proto-Kranz (Figure 5) and that the transition bears no fitness cost.

*GLK* proteins are transcription factors that directly activate a large number of downstream target genes encoding chloroplast-localized or photosynthesis-related proteins [25]. The modified development of mitochondria and plasmodesmata in bundle sheath and mestome cells of *ZmGLK* overexpression lines, therefore, most likely occurred as an indirect consequence of activated chloroplast development. Several communication routes between chloroplasts and mitochondria have been proposed, with the best characterized being signaling via redox state (for example, [39–41]). A direct link between chloroplasts, mitochondria, and plasmodesmata has also been recognized

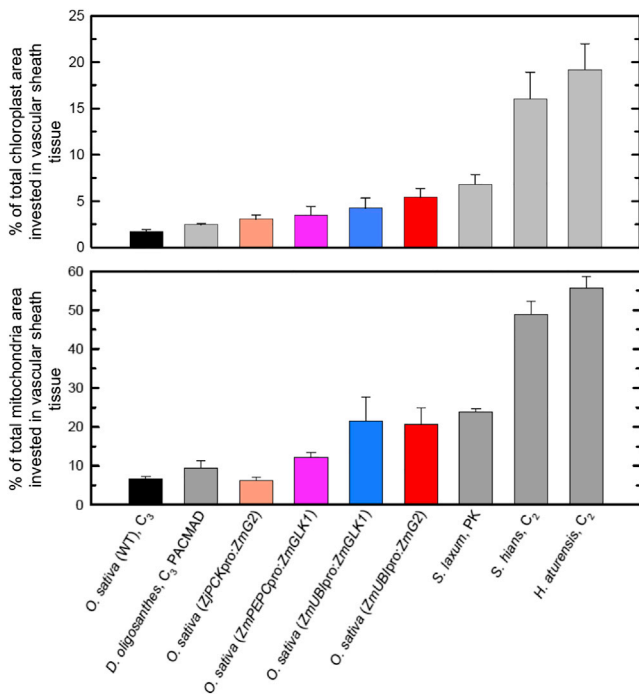

**Figure 5. Percentage of Planar Organelle Area Invested in Vascular Sheath Cells Is Equivalent to that in Proto-Kranz Grass Species**

Percentage of total planar chloroplast (top) and mitochondrial (bottom) area in vascular sheath cells of wild-type (WT) and transgenic rice lines, plus PACMAD grasses *Dicanthelium oligosanthos* (C<sub>3</sub>), *Steinchisma laxum* (proto-Kranz [PK]), *S. hiens* (C<sub>2</sub>), and *Homolepis aturensis* (C<sub>2</sub>). Values are mean  $\pm$  SEM (n = 3). The trend toward proto-Kranz correlates with levels of transgene expression. Both *ZmUBI<sub>pro</sub>-ZmG2* and *S. laxum* (PK) have significantly greater investment of chloroplasts and mitochondria in vascular sheath tissue than WT by a one-tailed t test (p < 0.05). No significant differences were observed between *ZmUBI<sub>pro</sub>-ZmG2* and *S. laxum* (PK) by one-tailed or paired t tests (p > 0.2). See Figures S1 and S2 and Table S1 for transgene details and transcript levels in lines examined, Table S5 for a complete set of measurements, and Figure S4 for equivalent graphs of C<sub>3</sub>, PK, and C<sub>2</sub> *Flaveria* spp.

The complexity of the anatomical and biochemical changes needed for the C<sub>3</sub>-to-C<sub>4</sub> transition appears seemingly incongruent with the multiple independent origins of the pathway [1]. However, the results presented here suggest that one of the earliest steps in C<sub>4</sub> evolution, the transition from C<sub>3</sub> to proto-Kranz, could have resulted from modified activity of a single gene. During the course of land plant evolution, the probability of a C<sub>3</sub>-to-proto-Kranz transition presumably depended on the number of genes able to induce that change. Very few transcriptional regulators of chloroplast development have been discovered, but functional analyses with the cytokinin GATA transcription factor CYTOKININ-RESPONSIVE GATA TRANSCRIPTION FACTOR 1 (CGA1) [36, 46] and GROWTH-REGULATING FACTOR 5 (GRF5) [47] suggest that both genes can activate chloroplast development in non-photosynthetic tissues. Roles upstream (GRF5) [47] and downstream (CGA1) [48] of GLK position both genes as potential regulators of at least some aspects of the C<sub>3</sub>-to-proto-Kranz transition. Whether or not this potential is validated, with the discovery that modifications to the activity of a single gene can kick-start the C<sub>3</sub>-to-C<sub>4</sub> transition, one of the

most remarkable examples of convergent evolution becomes slightly less mysterious.

## STAR★METHODS

Detailed methods are provided in the online version of this paper and include the following:

- KEY RESOURCES TABLE
- CONTACT FOR REAGENT AND RESOURCE SHARING
- EXPERIMENTAL MODEL AND SUBJECT DETAILS
  - Plants
  - Microbes
- METHOD DETAILS
  - Gene cloning and construct design
  - Rice transformation
  - PCR screening
  - DNA gel blot analysis
  - Quantitative RT-PCR
  - Chlorophyll quantification
  - Isolation of single cells
  - Light and transmission electron microscopy
  - Immunohistochemistry
  - Gas exchange measurements
  - Chlorophyll fluorescence for Fv/Fm and NPQ measurements
- QUANTIFICATION AND STATISTICAL ANALYSIS
  - Experimental design, sampling and statistical methods

## SUPPLEMENTAL INFORMATION

Supplemental Information includes six figures and six tables and can be found with this article online at <https://doi.org/10.1016/j.cub.2017.09.040>.

## AUTHOR CONTRIBUTIONS

Experimental Concept and Design, P.W., R.K., S.K., W.P.Q., R.F., T.L.S., and J.A.L.; Generation of Transformation Constructs and Genotypic, qPCR, and Phenotypic Analyses of Kitaake Lines, P.W.; Generation of IR64 Lines and Genotypic and Phenotypic Analyses of IR64 Lines, S.K.; Organelle Counts and TEM Analysis, R.K.; qPCR of IR64 Lines, R.T., C.P.B., and S.K.; DNA Gel Blot Analysis of IR64 Lines, C.P.B.; Data Analysis and Interpretation, P.W., R.K., S.K., A.B., W.P.Q., R.F., T.L.S., and J.A.L.; Initial Manuscript Preparation, P.W., R.K., S.K., T.L.S., and J.A.L. All authors contributed to the final version of the manuscript.

## ACKNOWLEDGMENTS

We thank Sarah Covshoff for providing transformation vectors; Elizabete Carmo-Silva, Martha Ludwig, and Christine Raines for antibodies; and Andreas Weber and Steve Kelly for comments on the manuscript. We are grateful to Florencia Montecillo and Virginia Laluz for technical assistance with IR64 tissue culture; Menard dela Rosa for PCR analysis, seed threshing, and photography; Albert de Luna, Rey Vergara, Govinda Rizal, and Hsiang-Chun Lin for plant husbandry; Irma Canicosa, Kelvin Acebron, and Robert Coe for technical assistance with photosynthesis measurements; Gemma Lorenzana and Rona Lunar for PCR screening of IR64 lines; Jacque Dionora for microscopy of IR64 lines; Xueqin Wang for generation of Kitaake lines; Zara Lewis and Na Li for technical assistance with analysis of Kitaake lines; Julia Lambret for southern blot analysis of T2 Kitaake lines; Julie Bull for general technical support; and John Baker for photography. Research was funded by a C<sub>4</sub> Rice Project grant from The Bill & Melinda Gates Foundation to IRR1 (2012–2015; OPPGD1394) and the University of Oxford (2015–2019; OPP1129902).



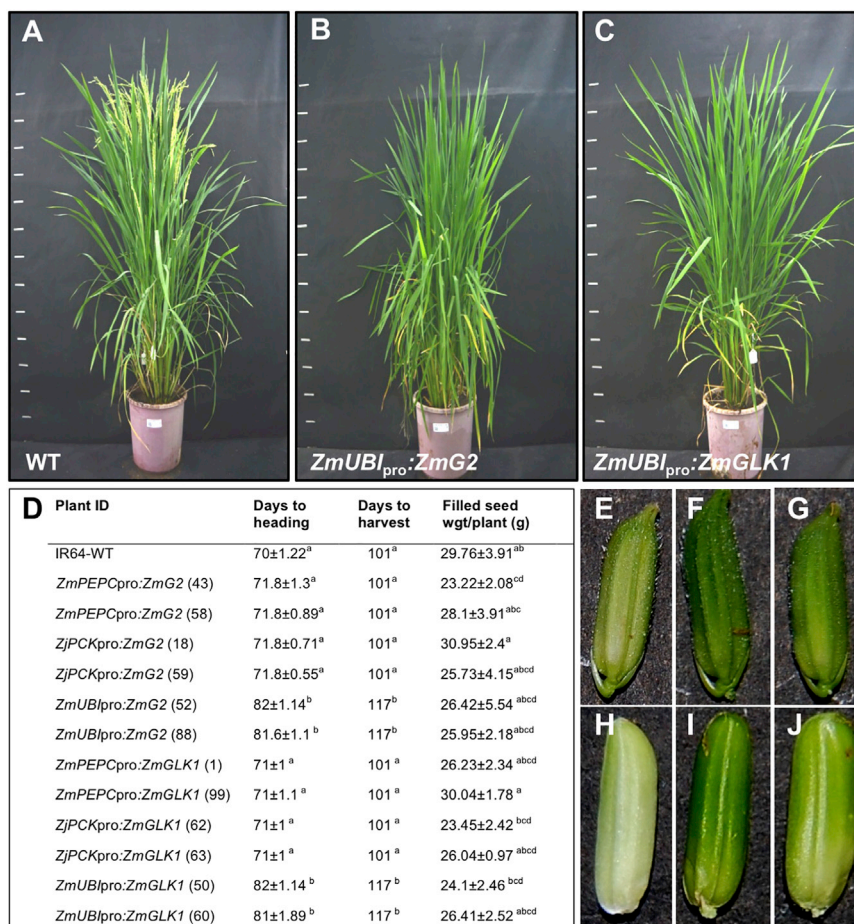

**Figure 6. Constitutive Expression of *ZmG2* or *ZmGLK1* Delays Flowering but Has No Impact on Yield**

(A–C) Representative whole-plant phenotypes of wild-type (WT) (A), *ZmUBI<sub>pro</sub>:ZmG2* (B), and *ZmUBI<sub>pro</sub>:ZmGLK1* (C) IR64 lines photographed 75 days after sowing.

(D) Heading (flowering) time and days to harvest (days after sowing in each case), plus filled seed weight (line number indicated in parentheses). Values are mean ± SEM of five individual plants. Means with the same letter are not significantly different, as assessed by ANOVA ( $p < 0.05$ ).

(E–J) Representative spikelet (E–G) and dehulled immature grain (H–J) phenotype of WT (E and H), *ZmUBI<sub>pro</sub>:ZmG2* (F and I), and *ZmUBI<sub>pro</sub>:ZmGLK1* (G and J) IR64 lines.

See Figure S1 and Table S1 for transgene details and copy number analysis, Figure S5 for transgene transcript levels, and Figure S6 for photo-synthetic measurements.

Received: August 16, 2017  
 Revised: September 18, 2017  
 Accepted: September 19, 2017  
 Published: October 19, 2017

## REFERENCES

- Sage, R.F., Christin, P.-A., and Edwards, E.J. (2011). The  $C_4$  plant lineages of planet Earth. *J. Exp. Bot.* 62, 3155–3169.
- Haberlandt, G. (1896). *Physiologische Pflanzenanatomie* (Wilhelm Engelmann).
- Brown, W.V. (1975). Variations in anatomy, associations, and origins of Kranz tissue. *Am. J. Bot.* 62, 395–402.
- Langdale, J.A. (2011).  $C_4$  cycles: past, present, and future research on  $C_4$  photosynthesis. *Plant Cell* 23, 3879–3892.
- Hattersley, P.W., Watson, L., and Johnston, C.R. (1982). Remarkable leaf anatomical variations in *Neurachne* and its allies (Poaceae) in relation to  $C_3$  and  $C_4$  photosynthesis. *Bot. J. Linn. Soc.* 84, 265–272.
- Ueno, O. (1992). Immunogold localization of photosynthetic enzymes in leaves of *Aristida latifolia*, a unique  $C_4$  grass with a double chlorenchymatous bundle sheath. *Physiol. Plant.* 85, 189–196.
- Voznesenskaya, E.V., Chuong, S.D.X., Koteyeva, N.K., Edwards, G.E., and Franceschi, V.R. (2005). Functional compartmentation of  $C_4$  photosynthesis in the triple-layered chlorenchyma of *Aristida* (Poaceae). *Funct. Plant Biol.* 32, 67–77.
- Lundgren, M.R., Osborne, C.P., and Christin, P.-A. (2014). Deconstructing Kranz anatomy to understand  $C_4$  evolution. *J. Exp. Bot.* 65, 3357–3369.
- Sage, R.F., Khoshravesh, R., and Sage, T.L. (2014). From proto-Kranz to  $C_4$  Kranz: building the bridge to  $C_4$  photosynthesis. *J. Exp. Bot.* 65, 3341–3356.
- Hibberd, J.M., Sheehy, J.E., and Langdale, J.A. (2008). Using  $C_4$  photosynthesis to increase the yield of rice-rationale and feasibility. *Curr. Opin. Plant Biol.* 11, 228–231.
- von Caemmerer, S., Quick, W.P., and Furbank, R.T. (2012). The development of  $C_4$  rice: current progress and future challenges. *Science* 336, 1671–1672.
- Khoshravesh, R., Stinson, C.R., Stata, M., Busch, F.A., Sage, R.F., Ludwig, M., and Sage, T.L. (2016).  $C_3$ - $C_4$  intermediacy in grasses: organelle enrichment and distribution, glycine decarboxylase expression, and the rise of  $C_2$  photosynthesis. *J. Exp. Bot.* 67, 3065–3078.
- Muhaidat, R., Sage, T.L., Frohlich, M.W., Dengler, N.G., and Sage, R.F. (2011). Characterization of  $C_3$ - $C_4$  intermediate species in the genus *Heliotropium* L. (Boraginaceae): anatomy, ultrastructure and enzyme activity. *Plant Cell Environ.* 34, 1723–1736.
- Sage, T.L., Busch, F.A., Johnson, D.C., Friesen, P.C., Stinson, C.R., Stata, M., Sultmanis, S., Rahman, B.A., Rawsthorne, S., and Sage, R.F. (2013). Initial events during the evolution of  $C_4$  photosynthesis in  $C_3$  species of *Flaveria*. *Plant Physiol.* 163, 1266–1276.
- Stata, M., Sage, T.L., Hoffmann, N., Covshoff, S., Ka-Shu Wong, G., and Sage, R.F. (2016). Mesophyll Chloroplast Investment in  $C_3$ ,  $C_4$  and  $C_2$  Species of the Genus *Flaveria*. *Plant Cell Physiol.* 57, 904–918.
- Dunning, L.T., Lundgren, M.R., Moreno-Villena, J.J., Namaganda, M., Edwards, E.J., Nosil, P., Osborne, C.P., and Christin, P.-A. (2017).

- Introgression and repeated co-option facilitated the recurrent emergence of C<sub>4</sub> photosynthesis among close relatives. *Evolution* 71, 1541–1555.
17. Christin, P.-A., Osborne, C.P., Chatelet, D.S., Columbus, J.T., Besnard, G., Hodkinson, T.R., Garrison, L.M., Vorontsova, M.S., and Edwards, E.J. (2013). Anatomical enablers and the evolution of C<sub>4</sub> photosynthesis in grasses. *Proc. Natl. Acad. Sci. USA* 110, 1381–1386.
  18. Vicentini, A., Barber, J.C., Aliscioni, S.S., Giussani, L.M., and Kellogg, E.A. (2008). The age of the grasses and clusters of origins of C<sub>4</sub> photosynthesis. *Glob. Change Biol.* 14, 2963–2977.
  19. Wang, P., Fouracre, J., Kelly, S., Karki, S., Gowik, U., Aubry, S., Shaw, M.K.K., Westhoff, P., Slamet-Loedin, I.H.H., Quick, W.P., et al. (2013). Evolution of *GOLDEN2-LIKE* gene function in C<sub>3</sub> and C<sub>4</sub> plants. *Planta* 237, 481–495.
  20. Rossini, L., Cribb, L., Martin, D.J., and Langdale, J.A. (2001). The maize *golden2* gene defines a novel class of transcriptional regulators in plants. *Plant Cell* 13, 1231–1244.
  21. Yasumura, Y., Moylan, E.C., and Langdale, J.A. (2005). A conserved transcription factor mediates nuclear control of organelle biogenesis in anciently diverged land plants. *Plant Cell* 17, 1894–1907.
  22. Fitter, D.W., Martin, D.J., Copley, M.J., Scotland, R.W., and Langdale, J.A. (2002). *GLK* gene pairs regulate chloroplast development in diverse plant species. *Plant J.* 31, 713–727.
  23. Powell, A.L.T., Nguyen, C.V., Hill, T., Cheng, K.L., Figueroa-Balderas, R., Aktas, H., Ashrafi, H., Pons, C., Fernández-Muñoz, R., Vicente, A., et al. (2012). *Uniform ripening* encodes a Golden 2-like transcription factor regulating tomato fruit chloroplast development. *Science* 336, 1711–1715.
  24. Hall, L.N., Rossini, L., Cribb, L., and Langdale, J.A. (1998). *GOLDEN 2*: a novel transcriptional regulator of cellular differentiation in the maize leaf. *Plant Cell* 10, 925–936.
  25. Waters, M.T., Wang, P., Korkaric, M., Capper, R.G., Saunders, N.J., and Langdale, J.A. (2009). *GLK* transcription factors coordinate expression of the photosynthetic apparatus in Arabidopsis. *Plant Cell* 21, 1109–1128.
  26. Nakamura, H., Muramatsu, M., Hakata, M., Ueno, O., Nagamura, Y., Hirochika, H., Takano, M., and Ichikawa, H. (2009). Ectopic overexpression of the transcription factor *OsGLK1* induces chloroplast development in non-green rice cells. *Plant Cell Physiol.* 50, 1933–1949.
  27. Rauf, M., Arif, M., Dortay, H., Matallana-Ramírez, L.P., Waters, M.T., Gil Nam, H., Lim, P.-O., Mueller-Roeber, B., and Balazadeh, S. (2013). *ORE1* balances leaf senescence against maintenance by antagonizing G2-like-mediated transcription. *EMBO Rep.* 14, 382–388.
  28. Garapati, P., Xue, G.-P., Munné-Bosch, S., and Balazadeh, S. (2015). Transcription factor *ATAF1* in Arabidopsis promotes senescence by direct regulation of key chloroplast maintenance and senescence transcriptional cascades. *Plant Physiol.* 168, 1122–1139.
  29. Tokumaru, M., Adachi, F., Toda, M., Ito-Inaba, Y., Yazu, F., Hirokawa, Y., Sakakibara, Y., Suiko, M., Kakizaki, T., and Inaba, T. (2017). Ubiquitin-Proteasome Dependent Regulation of the *GOLDEN2-LIKE 1* Transcription Factor in Response to Plastid Signals. *Plant Physiol.* 173, 524–535.
  30. Cornejo, M.J., Luth, D., Blankenship, K.M., Anderson, O.D., and Blechl, A.E. (1993). Activity of a maize ubiquitin promoter in transgenic rice. *Plant Mol. Biol.* 23, 567–581.
  31. Nomura, M., Higuchi, T., Ishida, Y., Ohta, S., Komari, T., Imaizumi, N., Miyao-Tokutomi, M., Matsuoka, M., and Tajima, S. (2005). Differential expression pattern of C<sub>4</sub> bundle sheath expression genes in rice, a C<sub>3</sub> plant. *Plant Cell Physiol.* 46, 754–761.
  32. Matsuoka, M., Kyozuka, J., Shimamoto, K., and Kano-Murakami, Y. (1994). The promoters of two carboxylases in a C<sub>4</sub> plant (maize) direct cell-specific, light-regulated expression in a C<sub>3</sub> plant (rice). *Plant J.* 6, 311–319.
  33. Waters, M.T., Moylan, E.C., and Langdale, J.A. (2008). *GLK* transcription factors regulate chloroplast development in a cell-autonomous manner. *Plant J.* 56, 432–444.
  34. Danila, F.R., Quick, W.P., White, R.G., Furbank, R.T., and von Caemmerer, S. (2016). The Metabolite pathway between bundle sheath and mesophyll: quantification of Plasmodesmata in leaves of C<sub>3</sub> and C<sub>4</sub> monocots. *Plant Cell* 28, 1461–1471.
  35. Hibberd, J.M., and Quick, W.P. (2002). Characteristics of C<sub>4</sub> photosynthesis in stems and petioles of C<sub>3</sub> flowering plants. *Nature* 415, 451–454.
  36. Hudson, D., Guevara, D.R., Hand, A.J., Xu, Z., Hao, L., Chen, X., Zhu, T., Bi, Y.-M., and Rothstein, S.J. (2013). Rice cytokinin GATA transcription Factor1 regulates chloroplast development and plant architecture. *Plant Physiol.* 162, 132–144.
  37. Heckmann, D., Schulze, S., Denton, A., Gowik, U., Westhoff, P., Weber, A.P.M., and Lercher, M.J. (2013). Predicting C<sub>4</sub> photosynthesis evolution: modular, individually adaptive steps on a Mount Fuji fitness landscape. *Cell* 153, 1579–1588.
  38. Williams, B.P., Johnstone, I.G., Covshoff, S., and Hibberd, J.M. (2013). Phenotypic landscape inference reveals multiple evolutionary paths to C<sub>4</sub> photosynthesis. *eLife* 2, e00961.
  39. Blanco, N.E., Guinea-Díaz, M., Whelan, J., and Strand, Å. (2014). Interaction between plastid and mitochondrial retrograde signalling pathways during changes to plastid redox status. *Philos. Trans. R. Soc. Lond. B Biol. Sci.* 369, 20130231.
  40. Ng, S., Giraud, E., Duncan, O., Law, S.R., Wang, Y., Xu, L., Narsai, R., Carrie, C., Walker, H., Day, D.A., et al. (2013). Cyclin-dependent kinase E1 (*CDKE1*) provides a cellular switch in plants between growth and stress responses. *J. Biol. Chem.* 288, 3449–3459.
  41. Ng, S., De Clercq, I., Van Aken, O., Law, S.R., Ivanova, A., Willems, P., Giraud, E., Van Breusegem, F., and Whelan, J. (2014). Anterograde and retrograde regulation of nuclear genes encoding mitochondrial proteins during growth, development, and stress. *Mol. Plant* 7, 1075–1093.
  42. Kobayashi, K., Otegui, M.S., Krishnakumar, S., Mindrinos, M., and Zambryski, P. (2007). *INCREASED SIZE EXCLUSION LIMIT 2* encodes a putative DEVH box RNA helicase involved in plasmodesmata function during Arabidopsis embryogenesis. *Plant Cell* 19, 1885–1897.
  43. Stonebloom, S., Burch-Smith, T., Kim, I., Meinke, D., Mindrinos, M., and Zambryski, P. (2009). Loss of the plant DEAD-box protein *ISE1* leads to defective mitochondria and increased cell-to-cell transport via plasmodesmata. *Proc. Natl. Acad. Sci. USA* 106, 17229–17234.
  44. Burch-Smith, T.M., and Zambryski, P.C. (2010). Loss of *INCREASED SIZE EXCLUSION LIMIT (ISE)1* or *ISE2* increases the formation of secondary plasmodesmata. *Curr. Biol.* 20, 989–993.
  45. Burch-Smith, T.M., Brunkard, J.O., Choi, Y.G., and Zambryski, P.C. (2011). Organelle-nucleus cross-talk regulates plant intercellular communication via plasmodesmata. *Proc. Natl. Acad. Sci. USA* 108, E1451–E1460.
  46. Chiang, Y.-H., Zubo, Y.O., Tapken, W., Kim, H.J., Lavanway, A.M., Howard, L., Pilon, M., Kieber, J.J., and Schaller, G.E. (2012). Functional characterization of the GATA transcription factors *GNC* and *CGA1* reveals their key role in chloroplast development, growth, and division in Arabidopsis. *Plant Physiol.* 160, 332–348.
  47. Vercruyssen, L., Tognetti, V.B., Gonzalez, N., Van Dingenen, J., De Milde, L., Bielach, A., De Rycke, R., Van Breusegem, F., and Inzé, D. (2015). *GROWTH REGULATING FACTOR5* stimulates Arabidopsis chloroplast division, photosynthesis, and leaf longevity. *Plant Physiol.* 167, 817–832.
  48. Kobayashi, K., Sasaki, D., Noguchi, K., Fujinuma, D., Komatsu, H., Kobayashi, M., Sato, M., Toyooka, K., Sugimoto, K., Niyogi, K.K., et al. (2013). Photosynthesis of root chloroplasts developed in Arabidopsis lines overexpressing *GOLDEN2-LIKE* transcription factors. *Plant Cell Physiol.* 54, 1365–1377.
  49. Simkin, A.J., McAusland, L., Headland, L.R., Lawson, T., and Raines, C.A. (2015). Multigene manipulation of photosynthetic carbon assimilation increases CO<sub>2</sub> fixation and biomass yield in tobacco. *J. Exp. Bot.* 66, 4075–4090.
  50. Feller, U., Crafts-Brandner, S.J., and Salvucci, M.E. (1998). Moderately high temperatures inhibit ribulose-1,5-bisphosphate

- carboxylase/oxygenase (Rubisco) activase-mediated activation of Rubisco. *Plant Physiol.* *116*, 539–546.
51. Hiei, Y., and Komari, T. (2006). Improved protocols for transformation of indica rice mediated by *Agrobacterium tumefaciens*. *Plant Cell Tissue Organ Cult.* *85*, 271–283.
  52. Yoshida, S., Forno, D.A., Cock, J.H., and Gomez, K.A. (1972). Routine Procedure for Growing Rice Plants in Culture Solution (International Rice Research Institute).
  53. Toki, S., Hara, N., Ono, K., Onodera, H., Tagiri, A., Oka, S., and Tanaka, H. (2006). Early infection of scutellum tissue with *Agrobacterium* allows high-speed transformation of rice. *Plant J.* *47*, 969–976.
  54. Murray, M.G., and Thompson, W.F. (1980). Rapid isolation of high molecular weight plant DNA. *Nucleic Acids Res.* *8*, 4321–4325.
  55. Guillemaut, P., and Maréchal-Drouard, L. (1992). Isolation of plant DNA: a fast, inexpensive, and reliable method. *Plant Mol. Biol. Report.* *10*, 60–65.
  56. Langdale, J.A., Rothermel, B.A., and Nelson, T. (1988). Cellular pattern of photosynthetic gene expression in developing maize leaves. *Genes Dev.* *2*, 106–115.
  57. Arnon, D.I. (1949). Copper enzymes in isolated chloroplasts. Polyphenoloxidase in *Beta vulgaris*. *Plant Physiol.* *24*, 1–15.
  58. Schneider, C.A., Rasband, W.S., and Eliceiri, K.W. (2012). NIH Image to ImageJ: 25 years of image analysis. *Nat. Methods* *9*, 671–675.
  59. Khoshravesht, R., Lundsgaard-Nielsen, V., Sultmanis, S., and Sage, T.L. (2017). Light microscopy, transmission electron microscopy, and immunohistochemistry protocols for studying photorespiration. In *Photorespiration: Methods and Protocols*, A.R. Fernie, H. Bauwe, and A.P.M. Weber, eds. (Springer), pp. 243–270.
  60. Reynolds, E.S. (1963). The use of lead citrate at high pH as an electron-opaque stain in electron microscopy. *J. Cell Biol.* *17*, 208–212.
  61. Livak, K.J., and Schmittgen, T.D. (2001). Analysis of relative gene expression data using real-time quantitative PCR and the  $2^{-\Delta\Delta C(T)}$  Method. *Methods* *25*, 402–408.
  62. McKown, A.D., and Dengler, N.G. (2007). Key innovations in the evolution of Kranz anatomy and  $C_4$  vein pattern in *Flaveria* (Asteraceae). *Am. J. Bot.* *94*, 382–399.

## STAR★METHODS

## KEY RESOURCES TABLE

| REAGENT or RESOURCE                                                                            | SOURCE                             | IDENTIFIER                   |
|------------------------------------------------------------------------------------------------|------------------------------------|------------------------------|
| <b>Antibodies</b>                                                                              |                                    |                              |
| Rabbit polyclonal anti-GLDP                                                                    | Martha Ludwig                      | [12]                         |
| Rabbit polyclonal anti-RuBisCo 557 kDa hexadecamer                                             | Agrisera, Martha Ludwig            | AS07 218; RRID: AB_1031802   |
| Rabbit polyclonal anti-FBPase                                                                  | Christine Raines                   | [49]                         |
| Rabbit monospecific anti-RuBisCo activase                                                      | Elizabete Carmo-Silva              | [50]                         |
| 18nm Colloidal Gold-AffiniPure Goat Anti-Rabbit IgG (H+L) (min X Hu,Ms,Rat Sr Prot) (EM Grade) | Cedarlane                          | Cat# 111-215-144             |
| <b>Bacterial and Virus Strains</b>                                                             |                                    |                              |
| <i>E. coli</i> strain DH5 $\alpha$                                                             | Widely distributed                 | N/A                          |
| <i>A. tumefaciens</i> strain EHA105                                                            | Widely distributed                 | N/A                          |
| <i>A. tumefaciens</i> strain LBA4404                                                           | Widely distributed                 | N/A                          |
| <b>Chemicals, Peptides, and Recombinant Proteins</b>                                           |                                    |                              |
| Glutaraldehyde 25%                                                                             | Electron Microscopy Sciences (EMS) | Cat# 16210                   |
| Paraformaldehyde (20%)                                                                         | EMS                                | Cat# 15713                   |
| Sodium cacodylate                                                                              | EMS                                | Cat# 12300                   |
| Osmium tetroxide 4%                                                                            | EMS                                | Cat# 19150                   |
| Low viscosity embedding kit (Dr. Spurr)                                                        | EMS                                | Cat# 14300                   |
| LRW (medium grade)                                                                             | EMS                                | Cat# 14381                   |
| Pectinase from <i>Aspergillus niger</i>                                                        | Sigma-Aldrich                      | Cat# 17389                   |
| <b>Critical Commercial Assays</b>                                                              |                                    |                              |
| Gateway BP Clonase II enzyme mix                                                               | Invitrogen                         | Cat#11789020                 |
| Gateway LR Clonase II enzyme mix                                                               | Invitrogen                         | Cat#11791100                 |
| GoTaq Green Master Mix                                                                         | Promega                            | M712                         |
| GoTaq G2 Green Master Mix                                                                      | Promega                            | M7822                        |
| TURBO DNA-free Kit                                                                             | Ambion                             | Cat#AM1907                   |
| SuperScript III Reverse Transcriptase                                                          | Invitrogen                         | Cat#18080093                 |
| TERRA PCR Direct polymerase mix                                                                | Clontech                           | Cat. No. 639270              |
| LightCycler 480 SYBR Green I Master (Real time PCR assays)                                     | Roche                              | #04707516001                 |
| SYBR Green PCR Master Mix                                                                      | Applied Biosystems                 | Cat#4309155                  |
| PCR DIG Probe Synthesis Kit                                                                    | Roche                              | Cat. No. 1 636 090           |
| Random Primers DNA Labeling System                                                             | Invitrogen                         | Cat#18187013                 |
| <b>Experimental Models: Organisms/Strains</b>                                                  |                                    |                              |
| <i>Oryza sativa</i> spp. <i>indica</i> cultivar IR64                                           | IRRI                               | N/A                          |
| <i>Oryza sativa</i> spp. <i>japonica</i> cultivar Kitaake                                      | IRRI                               | N/A                          |
| <i>Oryza sativa</i> IR64: <i>ZjPCK::ZmG2</i>                                                   | This paper                         | IR64-IRS-784                 |
| <i>Oryza sativa</i> IR64: <i>ZmPEPC::ZmG2</i>                                                  | This paper                         | IR64-IRS-782                 |
| <i>Oryza sativa</i> IR64: <i>ZmUbi::ZmG2</i>                                                   | This paper                         | IR64-IRS-786                 |
| <i>Oryza sativa</i> IR64: <i>ZjPCK::ZmGLK1</i>                                                 | This paper                         | IR64-IRS-785                 |
| <i>Oryza sativa</i> IR64: <i>ZmPEPC::ZmGLK1</i>                                                | This paper                         | IR64-IRS-783                 |
| <i>Oryza sativa</i> IR64: <i>ZmUbi::ZmGLK1</i>                                                 | This paper                         | IR64-IRS-787                 |
| <i>Oryza sativa</i> Kitaake <i>ZjPCKpro::ZmG2</i>                                              | This paper                         | 57C1, 57C2, 57C3             |
| <i>Oryza sativa</i> Kitaake <i>ZmUBIpro::ZmG2</i>                                              | This paper                         | 57E1, 57E2, 57E3, 57E4       |
| <i>Oryza sativa</i> Kitaake <i>ZmPEPC::ZmGLK1</i>                                              | This paper                         | 58A1, 58A2, 58A3, 58A4       |
| <i>Oryza sativa</i> Kitaake <i>ZmUBIpro::ZmGLK1</i>                                            | This paper                         | 58E1, 58E2, 58E3, 58E4, 58E5 |

(Continued on next page)

| <b>Continued</b>                                                         |                                                                       |                                                                                                                                                                                                                                             |
|--------------------------------------------------------------------------|-----------------------------------------------------------------------|---------------------------------------------------------------------------------------------------------------------------------------------------------------------------------------------------------------------------------------------|
| REAGENT or RESOURCE                                                      | SOURCE                                                                | IDENTIFIER                                                                                                                                                                                                                                  |
| Oligonucleotides                                                         |                                                                       |                                                                                                                                                                                                                                             |
| See <a href="#">Table S6</a>                                             | N/A                                                                   | N/A                                                                                                                                                                                                                                         |
| Recombinant DNA                                                          |                                                                       |                                                                                                                                                                                                                                             |
| cDNA of <i>ZmG2</i>                                                      | [20]                                                                  | GenBank: AF318579                                                                                                                                                                                                                           |
| cDNA of <i>ZmGLK1</i>                                                    | [20]                                                                  | GenBank: AF318580                                                                                                                                                                                                                           |
| Gateway donor vector                                                     | Thermo Fisher Scientific                                              | pDONR207                                                                                                                                                                                                                                    |
| Binary destination vectors                                               | Julian Hibberd                                                        | pSC110, pSC210, and pSC310                                                                                                                                                                                                                  |
| Plasmid pSC11057A, pSC11058A, pSC21057C, pSC21058C, pSC31057E, pSC31058E | This paper                                                            | N/A                                                                                                                                                                                                                                         |
| Software and Algorithms                                                  |                                                                       |                                                                                                                                                                                                                                             |
| SigmaPlot 12.5                                                           | Systat Software                                                       | <a href="http://www.sigmaplot.co.uk/products/sigmaplot/produpdates/prod-updates18.php">http://www.sigmaplot.co.uk/products/sigmaplot/produpdates/prod-updates18.php</a>                                                                     |
| SPSS 20                                                                  | IBM SPSS Statistics                                                   | <a href="https://www.ibm.com/support/knowledgecenter/en/SSLVMB_20.0.0/com.ibm.spss.statistics_20.kc.doc/pv_welcome.html">https://www.ibm.com/support/knowledgecenter/en/SSLVMB_20.0.0/com.ibm.spss.statistics_20.kc.doc/pv_welcome.html</a> |
| ImageJ                                                                   | NIH                                                                   | <a href="https://imagej.nih.gov/ij/">https://imagej.nih.gov/ij/</a>                                                                                                                                                                         |
| Other                                                                    |                                                                       |                                                                                                                                                                                                                                             |
| Soil: John Innes Compost No. 2                                           | Widely available                                                      | N/A                                                                                                                                                                                                                                         |
| Miracle-Gro All Purpose Plant Food                                       | <a href="https://www.miraclegro.com/">https://www.miraclegro.com/</a> | N/A                                                                                                                                                                                                                                         |

## CONTACT FOR REAGENT AND RESOURCE SHARING

Further information and requests for resources and reagents should be directed to and will be fulfilled by the Lead Contact, Jane Langdale ([jane.langdale@plants.ox.ac.uk](mailto:jane.langdale@plants.ox.ac.uk)). Please note that the transfer of transgenic rice lines will be governed by an MTA, will be dependent on appropriate import permits being acquired by the receiver, and may be constrained by the size of available seed stocks.

## EXPERIMENTAL MODEL AND SUBJECT DETAILS

### Plants

*Oryza sativa* spp. *indica* cultivar IR64 lines were grown in a transgenic greenhouse at the International Rice Research Institute (IRRI), Los Baños, Philippines (located at 14°9'53.58"S 121°15'32.19"E). The average day/night temperatures in the plant growth facility were 35 ± 3°C and 28 ± 3°C, respectively. Average light intensity and photoperiod were 824.75 ± 201.86 μmol photons m<sup>-2</sup> s<sup>-1</sup> and 13 hr day/11 hr night, respectively.

*Oryza sativa* spp. *japonica* cultivar Kitaake lines were grown in soil in a transgenic greenhouse in either Oxford, UK or Canberra, Australia. Day/night temperature was maintained at 30°C/22°C ± 3°C with a diurnal light regime of 16 hr light (supplemented to ~300 μmol photons m<sup>-2</sup> s<sup>-1</sup>) and 8 hr dark.

All plants were self-pollinated by bagging inflorescences after flowering.

### Microbes

*Agrobacterium tumefaciens* strains LBA4404 and EHA105 were cultured at 28°C in LB plus 100 mg L<sup>-1</sup> rifampicin and supplemented with 50 mg L<sup>-1</sup> kanamycin if harboring a plasmid for rice transformation.

## METHOD DETAILS

### Gene cloning and construct design

Full-length cDNAs of *ZmG2* (GenBank: AF318579) and *ZmGLK1* (GenBank: AF318580) were amplified by PCR from cDNA clones isolated previously [20] using Gateway compatible primers *ZmG2*-cloningF, *ZmG2*-cloningR, *ZmGLK1*-cloningF and *ZmGLK1*-cloningR (Table S6). The coding sequences were subcloned into the Gateway donor vector pDONR207 via a BP reaction, and the resulting entry clones were sequenced. Coding sequences were then cloned downstream of the *ZmPEPC*, *ZjPCK*, and *ZmUBI* promoters in the binary destination vectors pSC110, pSC210, and pSC310, respectively. The maize *UBIQUITIN* promoter (*ZmUBI<sub>pro</sub>*) was used to drive constitutive expression [30], the *Zoysia japonica* *PHOSPHOENOLPYRUVATE CARBOXYKINASE*

promoter (*ZjPCK<sub>pro</sub>*) for preferential expression in bundle sheath cells [31] and the maize *PHOSPHOENOLPYRUVATE CARBOXYLASE* promoter (*ZmPEPC<sub>pro</sub>*) for preferential expression in mesophyll cells [32]. Six constructs were produced via a LR reaction (Figure S1A).

### Rice transformation

*Oryza sativa* spp. *indica* cultivar IR64 and spp. *japonica* cultivar Kitaake were both used for transformation. For IR64, immature embryos were isolated from freshly harvested spikelets 8–12 days after anthesis. Embryos were inoculated with *Agrobacterium tumefaciens* strain LBA4404 carrying the plasmid DNA of interest and then cultured and regenerated according to the protocol of Hiei and Komari [51]. Briefly, after one week of co-cultivation at 25°C in the dark followed by growth on non-selective medium for 5 days, emerging resistant calli were selected on 30 mg L<sup>-1</sup> hygromycin B. Regeneration was subsequently carried out on 50 mg L<sup>-1</sup> hygromycin B for two weeks. Hygromycin-resistant regenerated T0 plantlets were transferred to Yoshida hydroponics solution [52] for 2 weeks prior to transplanting into soil in 7 L pots. For Kitaake, calli induced from mature seeds were transformed with *A. tumefaciens* strain EHA105 carrying the construct of interest. Callus induction, transformant selection and seedling regeneration were performed at 32°C under continuous light according to a protocol modified from [53] that can be downloaded at [https://langdalelab.files.wordpress.com/2015/07/kitaake\\_transformation\\_2015.pdf](https://langdalelab.files.wordpress.com/2015/07/kitaake_transformation_2015.pdf). Hygromycin-resistant T0 seedlings that screened positive for the transgene by PCR were transplanted into soil (John Innes Compost No.2) in 0.73 L pots.

### PCR screening

Regenerated T0 plants were subjected to genomic PCR using primers specific to the gene of interest or the cloning vector (Table S6: pVec8F (*UBI<sub>pro</sub>*), pVec8R (nosT), pSC110F(*PEPC<sub>pro</sub>*), pSC210F(*PCK<sub>pro</sub>*), HPTFpr3, HPTRpr2, pSC1/2/310-R, ZmG2-F, ZmG2-R, ZmGLK1-F, ZmGLK1-R). For IR64 T0 lines, small leaf sections were harvested two weeks after regeneration and used directly as templates for PCR screening. For T1 seedlings, leaf samples were harvested 10 days after germination. PCR amplification was performed in a total reaction volume of 10 µL using TERRA PCR Direct polymerase mix (Clontech). Plasmid DNA was used as a positive control and non-transgenic rice DNA and water were separately used as negative controls. PCR conditions were as follows: initial-denaturation for 2 min at 98°C; 30 cycles of amplification consisting of denaturation for 10 s at 98°C, annealing for 15 s at 60°C and extension for 45 s at 68°C; followed by a final extension step for 7 min at 72°C. For Kitaake lines, genomic DNA was isolated using a modified cetyl trimethylammonium bromide (CTAB) method [54] (see below), and was tested in 10 µL PCR reactions containing 5 µL 2xGoTaq mix (Promega) and 2.5 µL 4M betaine. PCR conditions were: 95°C for 5 min; 28 cycles of 95°C for 30 s, 55°C for 40 s, 72°C for 2.5 min; and 72°C for 5 min.

### DNA gel blot analysis

Genomic DNA was extracted from leaves of mature plants using potassium acetate (IR64 lines) [55] or CTAB (Kitaake lines) [54] methods. With the potassium acetate method, 1–2 g of rice leaves were ground to a fine powder in liquid nitrogen and suspended in 15 mL extraction buffer (100 mM Tris-HCl, 50 mM EDTA pH8.0, 500 mM NaCl, 0.07% β-mercaptoethanol). 1 mL 20% SDS was then added to the suspension, mixed well and incubated at 65°C for 30 min. After that time, 5 mL 5 M potassium acetate was added and mixed gently by shaking, before incubating at 4°C for 20 min. Samples were then centrifuged at 3500 rpm for 30 min, the supernatant was transferred to a fresh tube and nucleic acid was precipitated by adding 10 mL isopropanol followed by incubation at –20°C for 20 min. Nucleic acid was pelleted by centrifugation at 5000 rpm for 15 min and then re-suspended in 500 µL H<sub>2</sub>O. Samples were digested with 1 µL RNase (10 mg/mL) at 37°C for 10 min, extracted with 500 µL of chloroform: isoamyl alcohol (24:1) and centrifuged at 12000 rpm for 10 min. Supernatants were transferred to fresh tubes and DNA precipitated by adding 75 µL 3 M Sodium acetate and 500 µL isopropanol. After centrifugation at 12000 rpm for 5 min, pellets were washed twice with 500 µL 70% ethanol and air-dried. DNA pellets were dissolved in 100 µL H<sub>2</sub>O and stored at –20°C. With the CTAB method, leaves were first ground in liquid nitrogen, and suspended in 500 µL CTAB extraction solution containing 1.5% CTAB, 1.05 M NaCl, 75 mM Tris-HCl, 15 mM EDTA pH8.0. After incubation at 65°C for 20 min, an equal volume of chloroform:isoamylalcohol (24:1) was added, samples were mixed by vortexing and then centrifuged at 12000 rpm for 5 min. Supernatants were transferred to fresh tubes, precipitated by adding 2.5 volumes of 100% ethanol, and centrifuged at 12000 rpm for 5 min. The pellets were washed with 800 µL 70% ethanol, and air-dried. DNA samples were dissolved in 50 µL H<sub>2</sub>O and stored at –20°C.

For each plant, 6–8 µg of genomic DNA was digested with *Afl* II (*ZmG2* samples) or *Hind* III (*ZmGLK1* samples) restriction endonuclease. Digested DNA was electrophoresed and then transferred onto Hybond N+ membrane (GE Healthcare, UK). For IR64 lines, blots were hybridized with digoxigenin (DIG)-labeled gene specific probes synthesized using primers indicated in Figure S1A and Table S6, and the PCR DIG Probe Synthesis Kit (Roche Diagnostics, Germany). Hybridization signals were detected using CDP-Star according to the manufacturer's instructions (Roche Diagnostics). For the Kitaake lines, blots were hybridized as in [56], with <sup>32</sup>P labeled fragments of the hygromycin resistance gene synthesized using the Random Primers DNA Labeling System (Invitrogen), and exposed to autoradiography film.

Two independent IR64 lines with one or two transgene copies were obtained for each of the six constructs (Figures S1B and S1C; Table S1) and at least two independent Kitaake lines, with transgene copy numbers ranging from one to four, were obtained for *ZjPCK<sub>pro</sub>:ZmG2*, *ZmUBI<sub>pro</sub>:ZmG2*, *ZmPEPC<sub>pro</sub>:ZmGLK1* and *ZmUBI<sub>pro</sub>:ZmGLK1* constructs (Figures S1D–S1G; Table S1).

### Quantitative RT-PCR

4<sup>th</sup> and 7<sup>th</sup> leaves were harvested from transgenic plants and wild-type controls when leaves were at the youngest fully expanded stage. RNA was extracted using TRIZOL reagent (Invitrogen) or a QIAGEN RNeasy kit, and RNA integrity was confirmed by gel electrophoresis. For IR64 lines, total RNA was treated with RQ1 RNase free DNase (Promega) prior to use as template to synthesize cDNA with a first strand cDNA synthesis kit (Roche Diagnostics). Quantitative real time PCR was carried out with LightCycler 480 SYBR Green I Master mix in a final reaction volume of 20  $\mu$ L (Roche Diagnostics). Primers specific to the gene of interest and actin (Table S6) were used. For Kitaake lines, TURBO DNA-free Kit (Ambion) was used for DNase treatment, *SuperScript III* Reverse Transcriptase (Invitrogen) was used for first strand cDNA synthesis, and SYBR Green PCR Master Mix (Applied Biosystems) was used for quantitative RT-PCR on a StepOnePlus System (Applied Biosystems).

### Chlorophyll quantification

Leaf tissues of equal fresh weight were ground to a fine powder in liquid nitrogen, prior to submergence in equal volumes of 80% acetone. Samples were incubated overnight in the dark at 4°C prior to centrifugation for 1 min at 15,000  $\times$  g to remove cell debris. The chlorophyll content of the supernatant was measured at 663 and 645 nm using a spectrophotometer and quartz cuvettes. Total chlorophyll extracted ( $\mu$ g mL<sup>-1</sup>) was calculated as follows: (8.02  $\times$  Absorbance@663 nm) + (20.29  $\times$  Absorbance@645 nm) [57], and adjusted per weight of fresh tissue sampled (g).

### Isolation of single cells

2 mm sections of the recently fully expanded mid-region of leaves 4 and 7 were fixed (1 h) in 0.5% glutaraldehyde in 0.1 M sodium cacodylate buffer and incubated (3 h) in 0.2 M disodium EDTA, pH 9.0 in a water bath at 55°C. After incubation, samples were rinsed (20 min) in water and subsequently digestion buffer (20 min; 0.15 M sodium hydrogen phosphate, 0.04 M citric acid, pH 5.3). Leaf tissues were then incubated (1 h) at 45°C in 2% pectinase in digestion buffer and rinsed (30 min) in digestion buffer. Bundle sheath cells could be distinguished from mesophyll cells by an elongated shape (Figures 2B and 2D). Isolated bundle sheath cells were viewed with Nomarski optics and bundle sheath cell volume and chloroplast size were quantified with ImageJ [58] from images captured on a Zeiss Axioplan equipped with Olympus cellSens imaging software.

### Light and transmission electron microscopy

Leaves 4 and 7 were prepared for light and transmission electron microscopy (TEM), quantification of cellular features, and immunodetection of photosynthetic enzymes and glycine decarboxylase as described previously [59]. 2 mm leaf sections from the middle of recent fully expanded leaves were fixed in 1% glutaraldehyde and 1% paraformaldehyde in 0.1 M sodium cacodylate buffer (pH 6.8) overnight at room temperature, and post-fixed (2 hr) in 1% osmium tetroxide. Fixed tissue was rinsed (2  $\times$  30 min) in 0.1 M sodium cacodylate buffer. Samples were subsequently dehydrated in ethanol:H<sub>2</sub>O with 10% increment increases from 10% to 100% ethanol (1 hr each increment) and two (1 hr each) changes of 100% ethanol. Dehydrated tissue samples were infiltrated in Spurr's resin using 10% increment increases of Spurr's in 100% ethanol (3 hr each increment) from 10 to 100% Spurr's. After two changes in 100% Spurr's (12 hr each), tissue was polymerized at 60°C in a flat embedding mold. Fixation of leaf tissue for immunodetection of enzymes followed this same protocol except post-fixation with osmium tetroxide was omitted and specimens were infiltrated in London Resin White (LRW) using 1:3, 1:1, and 3:1 ratio of LRW to 100% ethanol (8 hr each increment), followed with 2  $\times$  100% LRW (8 hr each). LRW infiltrated leaf samples were polymerized at 60°C in an oxygen-free environment for 12 hr at 60°C. Sections of 1.7  $\mu$ m and 50–70 nm were collected for light and TEM, respectively. Images for light microscopy were captured on a Zeiss Axioplan equipped with Olympus cellSens imaging software and a Phillips 201 transmission electron microscope equipped with an Advantage HR camera system (Advanced Microscopy Techniques) was used to capture transmission electron micrographs.

### Immunohistochemistry

50–70 nm sections of LRW embedded tissue were rehydrated in 0.01 M phosphate saline buffer (PBS) pH. 7.4, blocked for 15 min with 0.4% or 0.5% bovine serum albumin (BSA) in PBS (for glycine decarboxylase and photosynthetic enzyme detection respectively), and then rinsed in PBS for 3  $\times$  15 min before incubating for 3 hr in primary antibody at the following concentrations: 1:50 (anti-glycine decarboxylase), 1:100 (anti-RuBisCo and anti-RuBisCo activase), and 1:400 (anti-FBPase) in 0.1% BSA/PBS. Sections were then rinsed in PBS 3  $\times$  15 min before incubation with secondary antibody (18nm Colloidal Gold-AffiniPure Goat Anti-Rabbit IgG) for 1 hr at a concentration of 1:20 (glycine decarboxylase) or 1:40 (photosynthetic enzymes) in 0.1% BSA/PBS. Samples were then rinsed in PBS for 3  $\times$  15 min, followed by ultrapure water for 3  $\times$  15 min before being stained with 4% uranyl acetate for 10 min, and then lead citrate for 5 min [60].

### Gas exchange measurements

Fully expanded 8<sup>th</sup> leaves were used to measure photosynthetic rates using a LI-6400XT portable photosynthesis system (LICOR Biosciences). Three individuals were sampled per line, and measurements were repeated three times. Measurements were made in the morning at a constant airflow rate of 400  $\mu$ mol s<sup>-1</sup>, leaf temperature of 30°C and a leaf-to-air vapor pressure deficit of between 1.0 and 1.5 kPa. Leaves were acclimated in the chamber for approximately 30 min before measurements were made on the mid-portion of the leaf blade. Net CO<sub>2</sub> assimilation rate (*A*) in response to intercellular CO<sub>2</sub> concentration (*C*) was measured at a light

intensity of 2,000  $\mu\text{mol photons m}^{-2} \text{s}^{-1}$  by increasing  $\text{CO}_2$  concentration in the cuvette from 20 to 2,000  $\mu\text{mol CO}_2 \text{mol}^{-1}$  air. Similarly, light response curves were produced by measuring net  $\text{CO}_2$  assimilation rate ( $A$ ) in response to increasing photosynthetic photon flux density (PPFD) from 20 to 2,000  $\mu\text{mol photons m}^{-2} \text{s}^{-1}$  at a  $\text{CO}_2$  concentration of 400  $\mu\text{mol CO}_2 \text{mol}^{-1}$  air.

### Chlorophyll fluorescence for Fv/Fm and NPQ measurements

For each individual, the three youngest fully expanded leaves of plants at maximum tillering stage were cut at the base and placed on a tray with the base of the leaves soaked in water to prevent drying and folding. Three individuals were sampled per line. The samples were dark adapted for 30 min prior to measurement. Fv/Fm and non photochemical quenching (NPQ) measurements were carried out using the PlantScreen Phenotyping System from Photon Systems Instruments (PSI), Czech Republic. Fluorescence images captured by the fluorometer were analyzed using the FluorCam7.0 software (PSI, Czech Republic).

## QUANTIFICATION AND STATISTICAL ANALYSIS

### Experimental design, sampling and statistical methods

For all experiments, at least three individuals representing at least two independent transgenic lines were evaluated. Experiments to measure photosynthetic parameters and seed yield were carried out using wild-type and transgenic lines of *Oryza sativa* spp. *indica* cultivar IR64 (Figure 6; Figures S1, S5, and S6; Table S1). All other experiments were carried out with wild-type and transgenic lines of *Oryza sativa* spp. *japonica* cultivar Kitaake.

To assess the impact of developmental regulation: samples harvested from leaf 4 and leaf 7 of plants grown in the same environment were compared, measuring transgene transcript levels in the same leaves used for phenotypic analysis. For qRT-PCR (Figure S2) and TEM/immunolocalization (Figures 3, 4, and 5; Table 1; Figure S3; Tables S3–S5) experiments, samples were collected 3 hr post-illumination. To minimize interference from starch granules, the same leaf was sampled 20 hr later for single cell measurements (Figure 2; Table S2).

For quantification of heading date and seed weight, five individuals from each of two independent lines per construct were analyzed (Figure 6). Transgene transcript levels were quantified in leaf 4 and 7 of three individuals from each of those independent lines (Figure S5), and measurements of photosynthetic capacity were carried out in leaf 8 of three individuals from one of those lines for each construct (Figure S6).

qRT-PCR experiments were carried out using three experimental replicates per biological sample (Figures S2 and S5). The  $2^{-\Delta\text{CT}}$  method was used to quantify the relative abundance of transcripts using the CT value of *OsActin* as the internal control for normalization [61]. Primer pairs for *ZmGLKs*, *OsGLKs* and *OsActin* were tested in standard PCR reactions against maize and rice cDNA respectively to ensure specific targets were amplified. For each primer pair, a standard curve was generated to ensure amplification efficiency had a linear relationship with cDNA concentration, with all primer pairs giving a linear regression ( $R^2$ ) value of 0.99, except for the primer pair for *OsGLK2* that showed an  $R^2$  value of 0.93. The overall primer efficiency values were between 96.8%–108.1%.

Average of individual chloroplast area and chloroplast numbers in isolated cells were quantified for 15 bundle sheath cells per individual (Figure 2; Table S2). 15 was established as the sample size based on preliminary experiments which showed that using more than 15 failed to alter the mean and variance for each individual. Three individuals were used per line as a standard minimum requirement. Bundle sheath cell volume was approximated using cell volume =  $[(W/2)^2] \cdot \pi \cdot (L)$ , where  $W$  = planar cell width and  $L$  = planar cell length. Cell volume was then used to quantify the number of chloroplasts/cell volume.

Planar cell area covered by total chloroplasts and mitochondria was quantified using ImageJ, sampling 15 mesophyll, bundle sheath or mestome sheath cells from TEM images of leaf 7 for each of three individuals from *ZjPCK<sub>pro</sub>:ZmG2*, *ZmPEPC<sub>pro</sub>:ZmGLK1*, *ZmUBI<sub>pro</sub>:ZmG2*, and *ZmUBI<sub>pro</sub>:ZmGLK1* lines (Figures 2 and 4; Table S3). Similar leaf tissue and the same sample size was used for quantification of gold density on *ZmUBI<sub>pro</sub>:ZmG2* and wild-type sections immuno-labeled for RuBisCo and RuBisCo activase (Table 1; Figure S3). The same leaf materials were used to quantify the percentage of leaf cross section covered by mesophyll, bundle sheath, and mestome sheath cells. The percentage of organelles invested in each cell-type was then quantified as the proportion of organellar area in that cell-type, relative to the total photosynthetic organellar area (Figure 5; Figure S4; Table S5) (as in the three equations below):

- 1) Total planar area of photosynthetic tissue (TP) was quantified as:

$$\text{TP} = T_M + T_{BS} + T_{MS}$$

Where  $T$  = % cell-type area in cross section ( $T_M$  = % planar Mesophyll,  $T_{BS}$  = % planar Bundle Sheath,  $T_{MS}$  = % planar Mestome Sheath)

- 2) Total photosynthetic organellar area (PO) in planar cross section (%) was quantified as:

$$\text{PO} = [(T_M/\text{TP})O_M] + [(T_{BS}/\text{TP})O_{BS}] + [(T_{MS}/\text{TP})O_{MS}]$$



Where O is the planar cell area covered by organelles (chloroplast or mitochondria)

3) The % of organelles invested in each cell-type was quantified as:

$$\% \text{ of organelle investment} = CO/PO \times 100$$

Where CO is the % of TP occupied by the cell-type (M, BS, or MS) organelle area; e.g.,  $CO_M = (T_M/TP) O_M$

Similar quantifications were performed for six PACMAD grasses from the raw data in [12]. *Flaveria* organellar data were from [14, 15], and the values for cell type % in *Flaveria* species were extracted from M:BS ratios in Figure 4 of [62].

For all cellular measurements, statistical tests were performed using SPSS 20.0 and graphed using SigmaPlot 12.5. For continuous variables, a Shapiro-Wilk test of normality was used to determine whether the data were normally distributed. When the normality test failed, a General Linear Model (GLM) followed by a Games-Howell post hoc test was performed. An ANOVA and a Tukey's test was used for normally distributed data. Presence or absence of plasmodesmata between bundle sheath-mesophyll and between bundle sheath-mesophyll cells was recorded as absence = 0, presence = 1. Relative frequency of plasmodesmata was calculated by dividing the number of cells which had plasmodesmata connections with the adjacent cell with the total number of observed cells for that cell-type. A GLM for binary data was performed where presence and absence of plasmodesmata between cell-types was the dependent variable, line was the fixed factor, and bundle sheath planar chloroplast and mitochondria area per planar cell area were covariates, using line as the main effect and a confidence interval of 95%.

Standard errors for heading time, days to harvest and filled seed weight, and ANOVA were calculated using the Statistical Tool for Agricultural Research (STAR) 2.01 software.

**Current Biology, Volume 27**

## **Supplemental Information**

### **Re-creation of a Key Step in the Evolutionary**

### **Switch from C<sub>3</sub> to C<sub>4</sub> Leaf Anatomy**

**Peng Wang, Roxana Khoshraresh, Shanta Karki, Ronald Tapia, C. Paolo Balahadia, Anindya Bandyopadhyay, W. Paul Quick, Robert Furbank, Tammy L. Sage, and Jane A. Langdale**

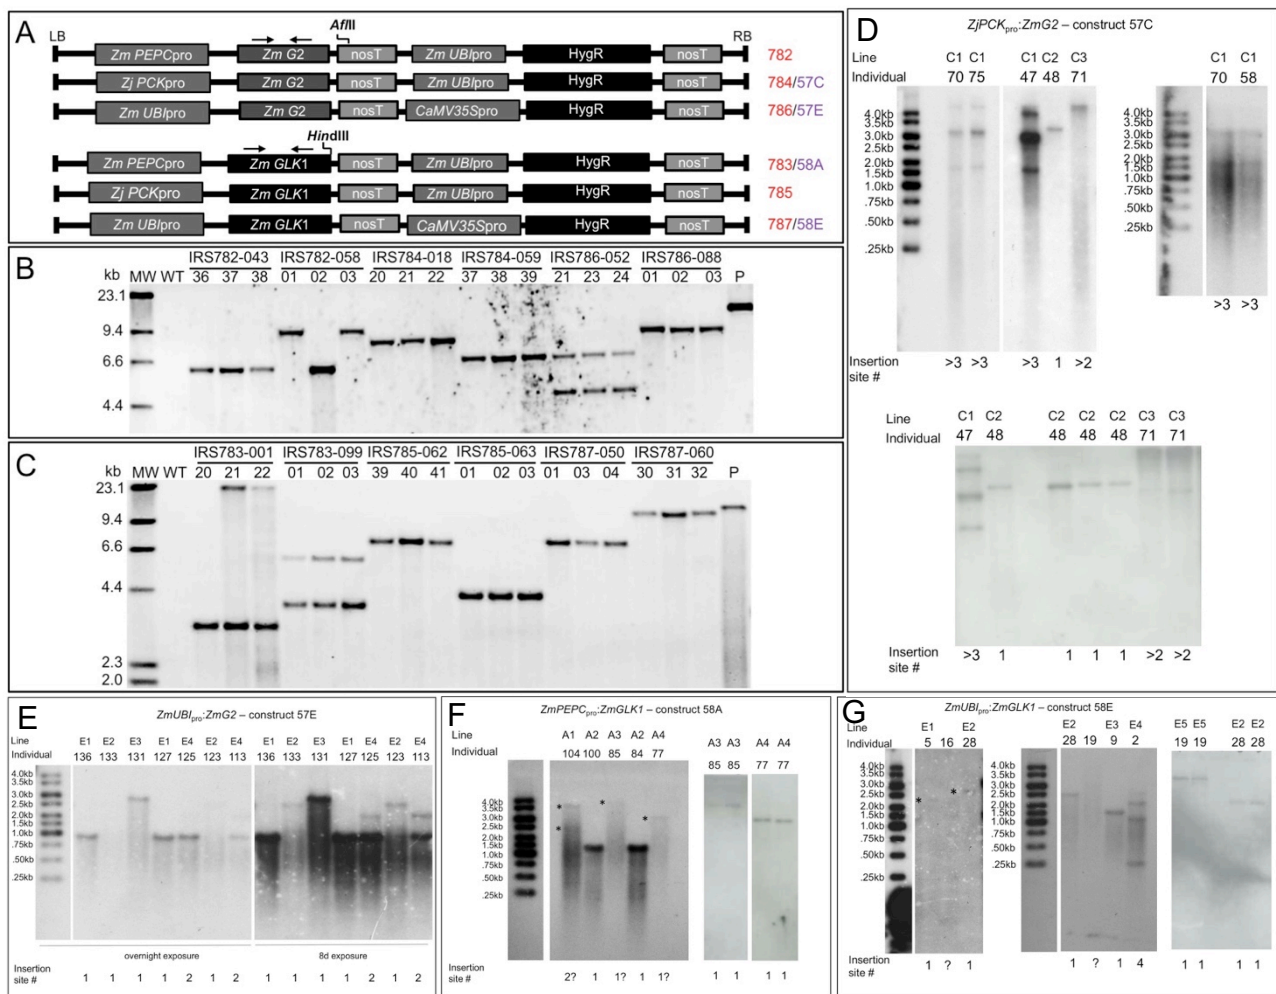

**Figure S1. Transgene copy number in *ZmG2* and *ZmGLK1* lines. Related to Figures 1-6.**

**A)** Constructs used for transformation. Arrows show primer positions used to amplify fragments for hybridization in (B) & (C). Blots in (D) - (F) were hybridized with the hygromycin resistance gene. Single *Afl* II and *Hind* III restriction sites within the constructs are indicated. LB = left border; RB = right border of T DNA. Numbers in red indicate construct reference for transformation into *O. sativa* *spp. indica* cultivar IR64, and in purple indicate construct reference for transformation into *O. sativa* *spp. japonica* cultivar Kitaake. **B, C)** Gel blot analysis of IR64 lines. *Afl* II digested DNA from wild-type (WT) plus 3 individuals of each of 2 independent *ZmPEPC<sub>pro</sub>:ZmG2* (IRS782-043; -058), *ZjPCK<sub>pro</sub>:ZmG2* (IRS784-018; -059) & *ZmUBI<sub>pro</sub>:ZmG2* (IRS786-052; -088) T1 lines. All lines have individuals with a single transgene insertion site except for IRS786-052 which has two. In line IRS782-058, either two transgenes have segregated or there is a 3kb deletion in one of the three individuals (B). *Hind* III digested DNA from WT plus 3 individuals of 2 independent *ZmPEPC<sub>pro</sub>:ZmGLK1* (IRS783-001; -099), *ZjPCK<sub>pro</sub>:ZmGLK1* (IRS785-062; -063) & *ZmUBI<sub>pro</sub>:ZmGLK1* (IRS787-050; -060) T1 lines. All lines have at least one individual with a single transgene insertion site except for IRS783-099 which has two. In line IRS783-001, segregation of two transgenes has resulted in one individual that is homozygous for one transgene (20), one that is homozygous for both transgenes (21) and one that is homozygous for one transgene and hemizygous for the second (22) (C). MW – molecular weight markers; P – plasmid. **D-G)** Cropped images of gel blot analysis of Kitaake lines. *Afl* II digested DNA from T1 plants (top) & T2 progeny (bottom) of lines transformed with *ZjPCK<sub>pro</sub>:ZmG2* construct 57C. 6 individuals were derived from 3 independent transgenic events, one of which (C2) represents a single insertion site (D). *Afl* II digested DNA of T1 lines transformed with *ZmUBI<sub>pro</sub>:ZmG2* construct 57E. 7 individuals display 4 independent transgene profiles, three of which (E1-E3)

represent a single insertion site (E). *Hind* III digested DNA of T1 plants (left) & T2 progeny (middle & right) of lines transformed with *ZmPEPC<sub>pro</sub>:ZmGLK1* construct 58A. 5 individuals display 4 independent transgene profiles, three of which (A2, A3 & A4) represent a single insertion site (F). *Hind* III digested DNA of T1 plants (left & middle) and T2 progeny (right) lines transformed with *ZmUBI<sub>pro</sub>:ZmGLK1* construct 58E. 6 individuals display at least 5 different transgene profiles, at least three of which (E2, E3 & E5) represent a single insertion site (G). Asterisks are positioned to the left of faint bands in (F) & (G).

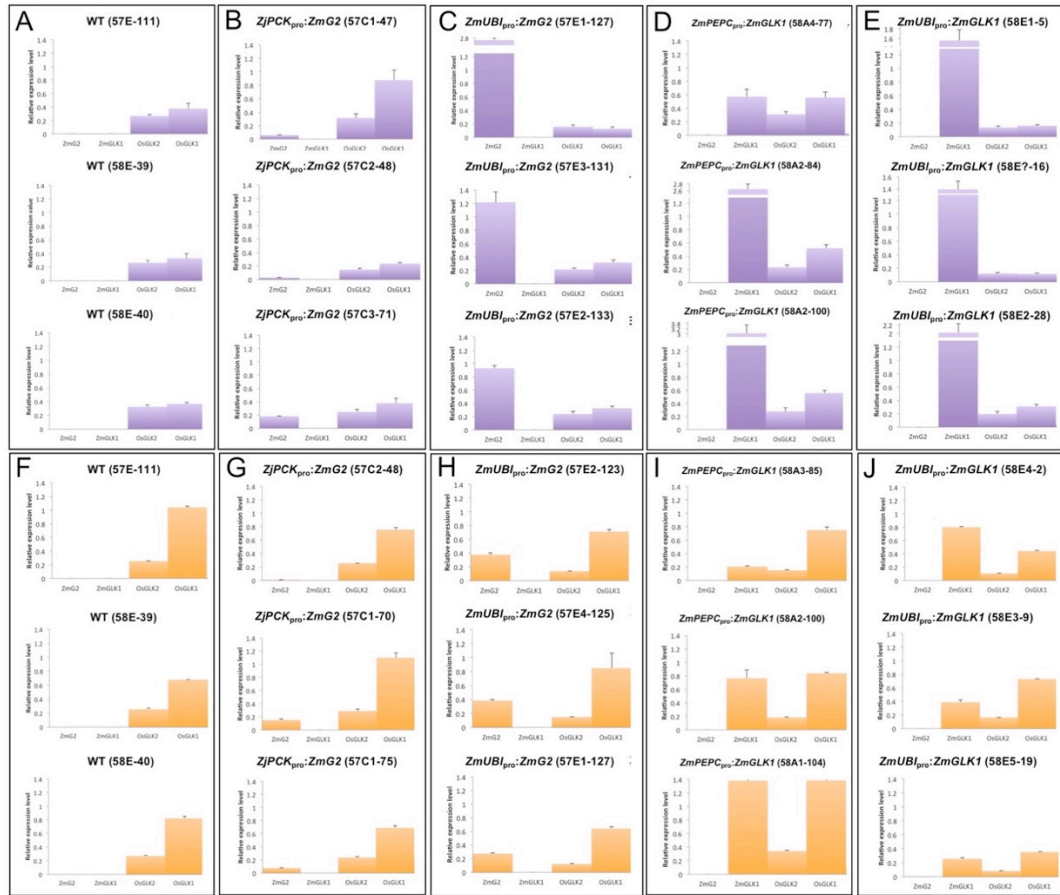

**Figure S2. Relative transcript levels in *ZmG2* and *ZmGLK1* T1 transgenic lines. Related to Figures 2-5, Table 1.**

**A-J)** Relative levels of *ZmG2* transgene, *ZmGLK1* transgene, *OsGLK2* and *OsGLK1* in 4<sup>th</sup> (A-E) and 7<sup>th</sup> (F-J) leaves of T1 Kitaake lines grown at 300  $\mu\text{mol photons m}^{-2} \text{s}^{-1}$ . Transcript levels were measured by qRT-PCR and adjusted relative to actin transcript levels using the  $\Delta\text{CT}$  value output from the StepOnePlus<sup>TM</sup> system. Error bars indicate standard error computed from the mean of three experimental replicates. Transgene transcript levels were higher in leaf 4 (regardless of promoter) than leaf 7, whereas endogenous *OsGLK1* transcript levels were higher in leaf 7 than leaf 4. The bundle sheath preferential *ZjPCK*<sub>pro</sub> consistently drove the lowest levels of transgene expression. Transgene copy number in each line is shown in Figure S1. Lines are those used for analyses in Figures 2-5 and Table 1 of the main paper.

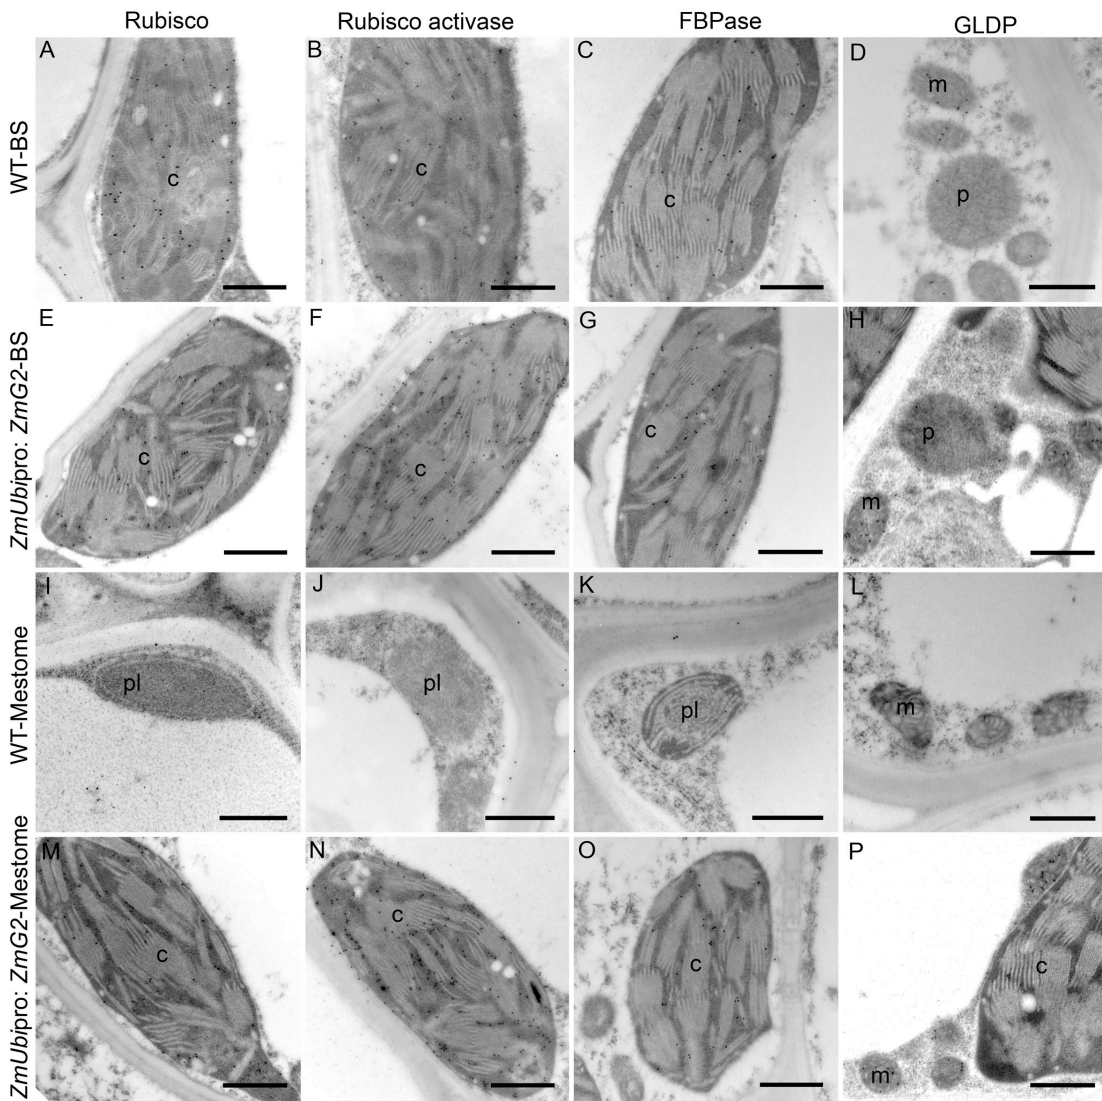

**Figure S3. Immunolocalization of photosynthetic enzymes and mitochondrial glycine decarboxylase in vascular sheath cells of wild-type and transgenic lines. Related to Figure 3, Table 1.**

**A-P** Immuno-gold labeling of wild-type (WT) (A-D, I-L) and *ZmUBI<sub>pro</sub>:ZmG2* transgenic Kitaake (E-H, M-P) bundle sheath (A-H) and mestome sheath (I-P) cells. Sections were reacted with antibodies against chloroplast localized RuBisCo (A, E, I, M), RuBisCo activase (B, F, J, N) and fructose-1,6-bis-phosphatase (FBPase) (C, G, K, O) or mitochondrial localized P subunit of glycine decarboxylase (GLDP) (D, H, L, P). All sections were prepared from leaf 7 of plants grown at 300  $\mu\text{mol photons m}^{-2} \text{s}^{-1}$ . Scale bars = 500nm; c, chloroplast; m, mitochondria; p, peroxisome; pl, proplastid. See Table S1 for details of transgenic lines used, Figure S2 for transgene transcript levels. Quantification of RuBisCo and RuBisCo activase labeling is shown in Table 1 of main paper.

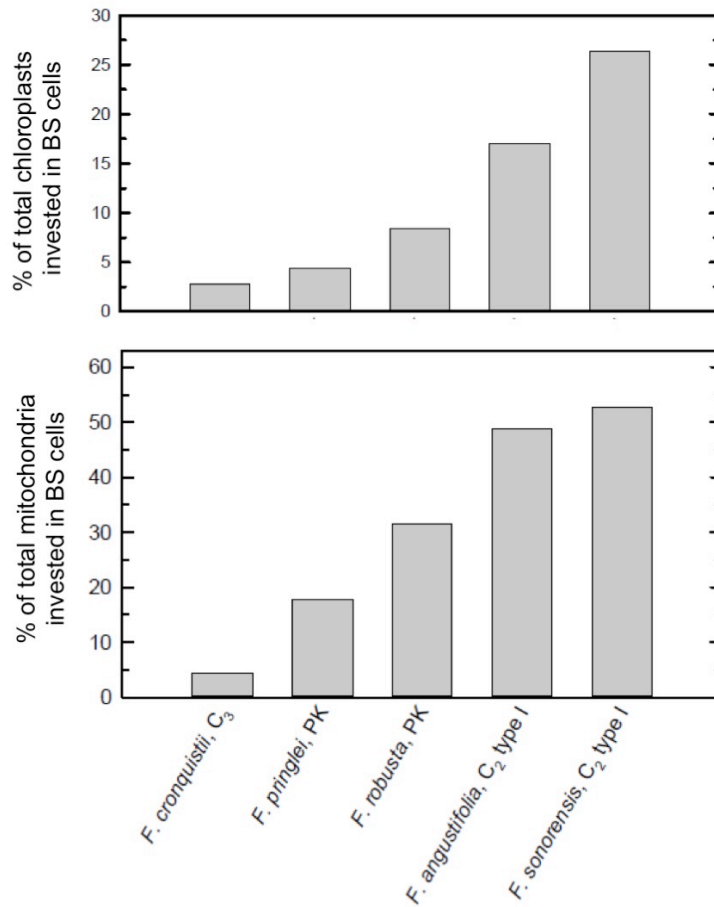

**Figure S4. Relative investment of organelles in bundle sheath cells of *Flaveria* species. Related to Figure 5.**

Percentage of total chloroplasts (upper panel) and mitochondria (lower panel) invested in bundle sheath cells (on a planar area basis) in the photosynthetic tissue of C<sub>3</sub>, proto-Kranz (PK) and C<sub>2</sub> *Flaveria*. Organellar data are from [S1,S2] and the values for cell type % are extracted from M:BS ratios in Fig. 4 of [S3]. Calculations are as in experimental design section of methods and Table S5.

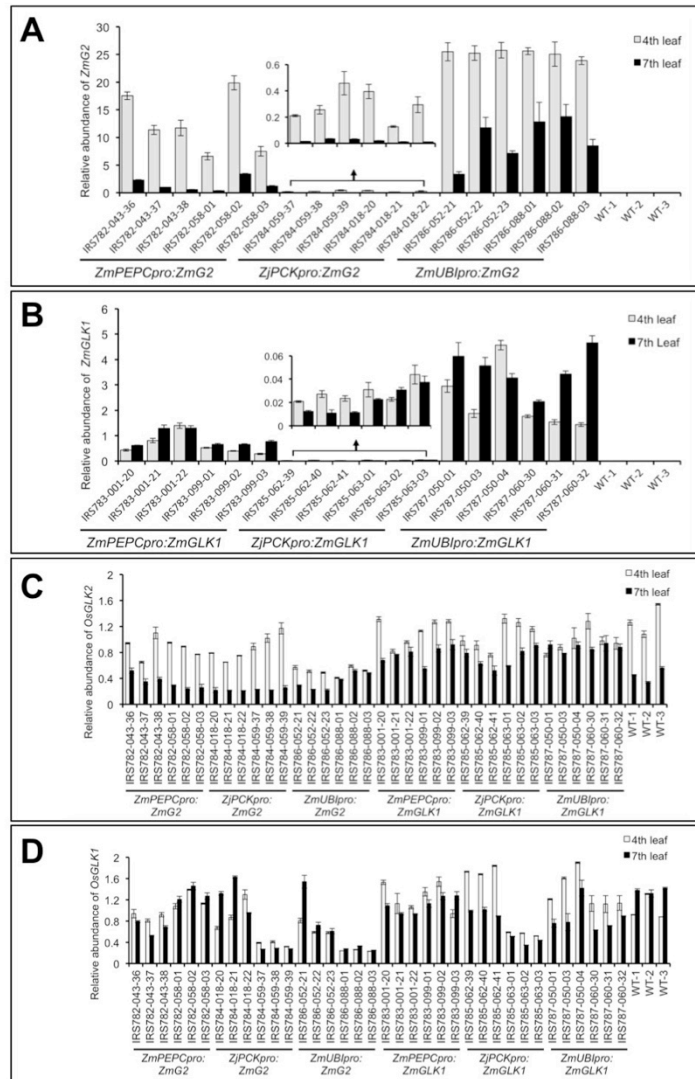

**Figure S5. Transcript accumulation levels in *ZmG2* and *ZmGLK1* overexpression lines. Related to Figure 6.**

**A-D)** Relative levels of *ZmG2* transgene (A), *ZmGLK1* transgene (B), *OsGLK2* (C) and *OsGLK1* (D) transcripts in 4<sup>th</sup> and 7<sup>th</sup> leaves of the IR64 lines genotyped in Figure S1. Transcript levels were measured by qRT-PCR and adjusted relative to actin transcript levels using the  $2^{-\Delta CT}$  method. Error bars indicate standard error computed from the mean of three experimental replicates. As with equivalent Kitaake lines (Figure S2) *ZmG2* Transgene transcript levels were higher in leaf 4 (regardless of promoter) than leaf 7, however, *ZmGLK1* transcripts were similar at both developmental stages. A similar distinction was seen between the orthologous *OsGLK2* and *OsGLK1* transcripts, suggesting that sequence-specific post-transcriptional regulation may be operating. Lines are those used for analyses in Figure 6 of the main paper.



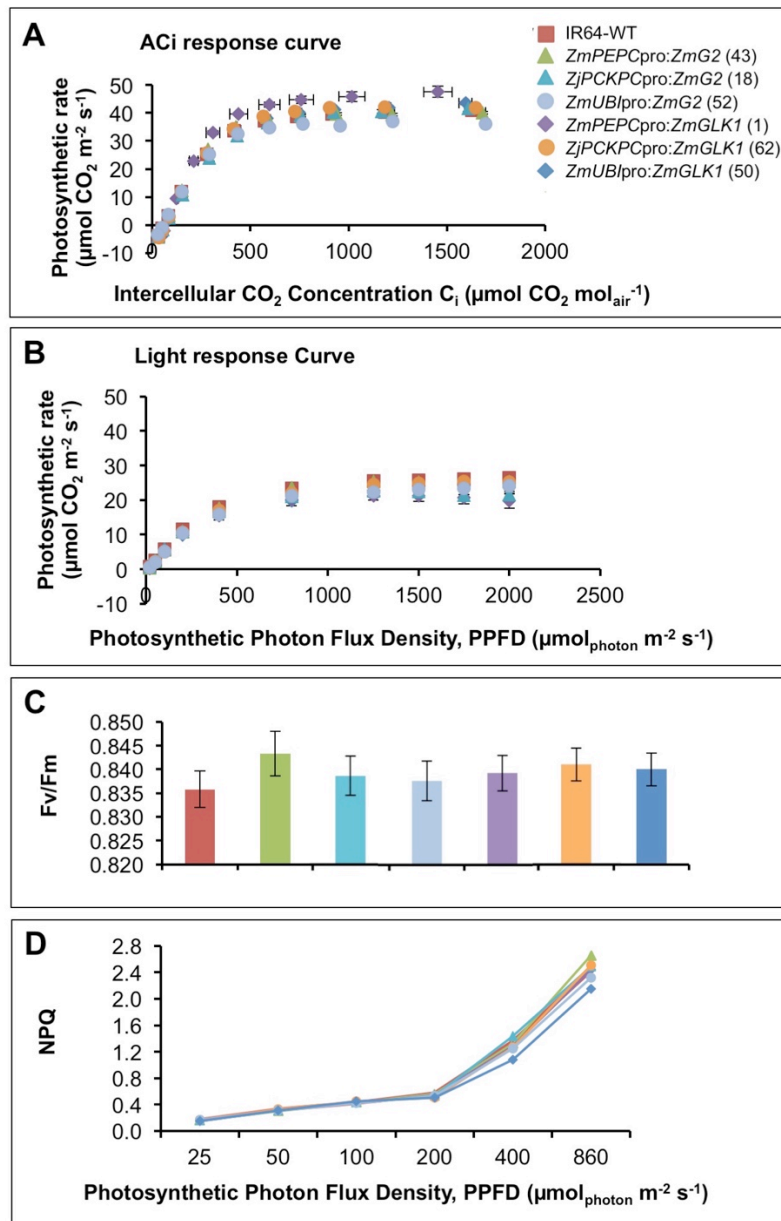

**Figure S6. Overall photosynthetic parameters are not altered in rice lines expressing *ZmG2* or *ZmGLK1*. Related to Figure 6.**

**A)** A-Ci response curve **B)** Light response curve **C)** Quantum yield (Fv/Fm) measurements **D)** Non-photochemical quenching (NPQ) response. Datapoints for each line are colour coded as in (A), with the line number indicated in parentheses. Error bars represent s.e.m.  $n=9$ . For A & B three individuals were measured per line, with three experimental replicates in each case. For C & D, three different leaves were measured for each of three individuals per line. Transgene copy number and expression levels for each line are shown in Figure S1 and S5, respectively. Whole plant phenotypes and yield data for the same lines are shown in Figure 6 of the main paper.

|                                    | Cultivar | Original line number | # insertion sites | Leaf 4 single cell counts & qPCR | Leaf 7 single cell counts, TEM & qPCR |
|------------------------------------|----------|----------------------|-------------------|----------------------------------|---------------------------------------|
| <i>ZmPEPC<sub>pro</sub>:ZmG2</i>   | IR64     | IRS782-043           | 1                 |                                  |                                       |
| <i>ZmPEPC<sub>pro</sub>:ZmG2</i>   | IR64     | IRS782-058           | 1                 |                                  |                                       |
|                                    |          |                      |                   |                                  |                                       |
| <i>ZjPCK<sub>pro</sub>:ZmG2</i>    | IR64     | IRS784-018           | 1                 |                                  |                                       |
| <i>ZjPCK<sub>pro</sub>:ZmG2</i>    | IR64     | IRS784-059           | 1                 |                                  |                                       |
| <i>ZjPCK<sub>pro</sub>:ZmG2</i>    | Kitaake  | 57C1                 | >3                | C1-47                            | C1-70, 75                             |
| <i>ZjPCK<sub>pro</sub>:ZmG2</i>    | Kitaake  | 57C2                 | 1                 | C2-48                            | C2-48                                 |
| <i>ZjPCK<sub>pro</sub>:ZmG2</i>    | Kitaake  | 57C3                 | >2                | C3-71                            |                                       |
|                                    |          |                      |                   |                                  |                                       |
| <i>ZmUBI<sub>pro</sub>:ZmG2</i>    | IR64     | IRS786-052           | 2                 |                                  |                                       |
| <i>ZmUBI<sub>pro</sub>:ZmG2</i>    | IR64     | IRS786-088           | 1                 |                                  |                                       |
| <i>ZmUBI<sub>pro</sub>:ZmG2</i>    | Kitaake  | 57E1                 | 1                 | E1-127                           | E1-127                                |
| <i>ZmUBI<sub>pro</sub>:ZmG2</i>    | Kitaake  | 57E2                 | 1                 | E2-133                           | E2-123                                |
| <i>ZmUBI<sub>pro</sub>:ZmG2</i>    | Kitaake  | 57E3                 | 1                 | E3-131                           |                                       |
| <i>ZmUBI<sub>pro</sub>:ZmG2</i>    | Kitaake  | 57E4                 | 2                 |                                  | E4-125                                |
|                                    |          |                      |                   |                                  |                                       |
| <i>ZmPEPC<sub>pro</sub>:ZmGLK1</i> | IR64     | IRS783-001           | 2                 |                                  |                                       |
| <i>ZmPEPC<sub>pro</sub>:ZmGLK1</i> | IR64     | IRS783-099           | 2                 |                                  |                                       |
| <i>ZmPEPC<sub>pro</sub>:ZmGLK1</i> | Kitaake  | 58A1                 | 2?                |                                  | A1-104                                |
| <i>ZmPEPC<sub>pro</sub>:ZmGLK1</i> | Kitaake  | 58A2                 | 1                 | A2-84,100                        | A2-100                                |
| <i>ZmPEPC<sub>pro</sub>:ZmGLK1</i> | Kitaake  | 58A3                 | 1                 |                                  | A3-85                                 |
| <i>ZmPEPC<sub>pro</sub>:ZmGLK1</i> | Kitaake  | 58A4                 | 1                 | A4-77                            |                                       |
|                                    |          |                      |                   |                                  |                                       |
| <i>ZjPCK<sub>pro</sub>:ZmGLK1</i>  | IR64     | IRS785-062           | 1                 |                                  |                                       |
| <i>ZjPCK<sub>pro</sub>:ZmGLK1</i>  | IR64     | IRS785-063           | 1                 |                                  |                                       |
|                                    |          |                      |                   |                                  |                                       |
| <i>ZmUBI<sub>pro</sub>:ZmGLK1</i>  | IR64     | IRS787-050           | 1                 |                                  |                                       |
| <i>ZmUBI<sub>pro</sub>:ZmGLK1</i>  | IR64     | IRS787-060           | 1                 |                                  |                                       |
| <i>ZmUBI<sub>pro</sub>:ZmGLK1</i>  | Kitaake  | 58E1                 | 1                 | E1-5                             |                                       |
| <i>ZmUBI<sub>pro</sub>:ZmGLK1</i>  | Kitaake  | 58E2                 | 1                 | E2-28                            |                                       |
| <i>ZmUBI<sub>pro</sub>:ZmGLK1</i>  | Kitaake  | 58E3                 | 1                 |                                  | E3-9                                  |
| <i>ZmUBI<sub>pro</sub>:ZmGLK1</i>  | Kitaake  | 58E4                 | 4                 |                                  | E4-2                                  |
| <i>ZmUBI<sub>pro</sub>:ZmGLK1</i>  | Kitaake  | 58E5                 | 1                 |                                  | E5-19                                 |
| <i>ZmUBI<sub>pro</sub>:ZmGLK1</i>  | Kitaake  | 58E?                 | ?                 | E-16                             |                                       |

**Table S1. Summary of transgenic lines analyzed. Related to Figures 1-6.**

| Line                                   | Planar Chloroplast Area ( $\mu\text{m}^2$ ) | Chloroplast Number/BS Cell | Chloroplast Number/BS Cell Volume ( $\mu\text{m}^3 \times 10^{-3}$ ) | BS Cell Volume, ( $\mu\text{m}^3$ ) |
|----------------------------------------|---------------------------------------------|----------------------------|----------------------------------------------------------------------|-------------------------------------|
| <b>Leaf 4</b>                          |                                             |                            |                                                                      |                                     |
| WT                                     | 10.58±0.37 <sup>a</sup>                     | 14 (6-21)                  | 2.90±0.27 <sup>a</sup>                                               | 5518±479 <sup>a</sup>               |
| <i>ZjPCK<sub>pro</sub>:ZmG2</i> (3)    | 11.76±0.35 <sup>a</sup>                     | 15 (7-26)                  | 2.84±0.14 <sup>a</sup>                                               | 6386±539 <sup>a</sup>               |
| <i>ZmUBI<sub>pro</sub>:ZmG2</i> (3)    | 15.85±0.69 <sup>b</sup>                     | 13 (8-21)                  | 3.44±0.27 <sup>a</sup>                                               | 5088±462 <sup>a</sup>               |
| <i>ZmPEPC<sub>pro</sub>:ZmGLK1</i> (2) | 11.68±0.36 <sup>a</sup>                     | 15(10-20)                  | 4.03±0.31 <sup>a</sup>                                               | 5339±621 <sup>a</sup>               |
| <i>ZmUBI<sub>pro</sub>:ZmGLK1</i> (2)  | 13.67±0.39 <sup>b</sup>                     | 13 (9-19)                  | 3.08±0.22 <sup>a</sup>                                               | 5076±335 <sup>a</sup>               |
| <b>Leaf 7</b>                          |                                             |                            |                                                                      |                                     |
| WT                                     | 8.82±0.28 <sup>a</sup>                      | 12 (9-19)                  | 3.26±0.29 <sup>a</sup>                                               | 4803±320 <sup>a</sup>               |
| <i>ZjPCK<sub>pro</sub>:ZmG2</i> (2)    | 10.94±0.32 <sup>b</sup>                     | 15 (11-22)                 | 3.63±0.23 <sup>a</sup>                                               | 4720±206 <sup>a</sup>               |
| <i>ZmUBI<sub>pro</sub>:ZmG2</i> (3)    | 15.55±0.50 <sup>c</sup>                     | 15(11-21)                  | 4.05±0.30 <sup>a</sup>                                               | 4606±324 <sup>a</sup>               |
| <i>ZmPEPC<sub>pro</sub>:ZmGLK1</i> (3) | 12.80±0.38 <sup>d</sup>                     | 14 (11-20)                 | 3.77±0.23 <sup>a</sup>                                               | 4541±322 <sup>a</sup>               |
| <i>ZmUBI<sub>pro</sub>:ZmGLK1</i> (3)  | 13.30±0.57 <sup>d</sup>                     | 15 (9-22)                  | 3.89±0.27 <sup>a</sup>                                               | 4427±280 <sup>a</sup>               |

**Table S2. Quantification of chloroplast size and number in bundle sheath cells. Related to Figure 2.**

Planar chloroplast area, number, and number per cell volume in isolated bundle sheath (BS) cells from leaves 4 and 7 of T1 transgenic Kitaake and wild-type (WT) lines grown at 300  $\mu\text{mol photons m}^{-2} \text{ s}^{-1}$ . Transgene transcript levels in each leaf at the time of harvesting are shown in Figure S2. Mean  $\pm$  s.e.m. (except chloroplast number which is represented by median and range), n = 45 i.e. 15 BS cells from each of three individuals representing at least 2 independent transgenic lines (number of independent lines in each sample is indicated in parentheses after construct name). Statistically distinct groups for each leaf are indicated by superscripted letters ( $p < 0.05$ ) as determined by a Games-Howell test of variance. Data correspond to Figure 2 in main text.

|                                                                                                  | WT                      | <i>ZjPCK<sub>pro</sub>:<br/>ZmG2</i> | <i>ZmUBI<sub>pro</sub>:<br/>ZmG2</i> | <i>ZmPEPC<sub>pro</sub>:<br/>ZmGLK1</i> | <i>ZmUBI<sub>pro</sub>:<br/>ZmGLK1</i> |
|--------------------------------------------------------------------------------------------------|-------------------------|--------------------------------------|--------------------------------------|-----------------------------------------|----------------------------------------|
| <b>Planar chloroplast area/<br/>planar cell area (%)</b>                                         |                         |                                      |                                      |                                         |                                        |
| BS                                                                                               | 5.3±0.7 <sup>a</sup>    | 7.2±0.7 <sup>ab</sup>                | 12.9±0.7 <sup>c</sup>                | 9.3±0.7 <sup>b</sup>                    | 7.0±0.7 <sup>ab</sup>                  |
| MS                                                                                               | 0.4±0.2 <sup>a</sup>    | 1.0±0.6 <sup>ab</sup>                | 16.3±1.9 <sup>c</sup>                | 1.3±0.3 <sup>b</sup>                    | 7.2±1.3 <sup>d</sup>                   |
| M*                                                                                               | 50.9±1.5 <sup>a</sup>   | 50.3±1.8 <sup>a</sup>                | 54.6±1.2 <sup>a</sup>                | 48.7±1.8 <sup>a</sup>                   | 48.4±2.1 <sup>a</sup>                  |
| <b>Planar mitochondria area/<br/>planar cell area (%)</b>                                        |                         |                                      |                                      |                                         |                                        |
| BS                                                                                               | 0.5±0.2 <sup>a</sup>    | 0.4±0.2 <sup>a</sup>                 | 2.9±0.2 <sup>b</sup>                 | 0.5±0.2 <sup>a</sup>                    | 1.9±0.2 <sup>b</sup>                   |
| MS                                                                                               | 1.4±0.2 <sup>a</sup>    | 1.8±0.2 <sup>ab</sup>                | 2.3±0.2 <sup>b</sup>                 | 1.5±0.2 <sup>ab</sup>                   | 2.0±0.2 <sup>ab</sup>                  |
| M                                                                                                | 2.0±0.1 <sup>a</sup>    | 3.3±0.3 <sup>b</sup>                 | 2.3±0.2 <sup>ab</sup>                | 1.3±0.1 <sup>c</sup>                    | 1.9±0.1 <sup>a</sup>                   |
| <b>Planar mitochondria #/ planar<br/>cell area, <math>\mu\text{m}^{-2} \times 10^{-3}</math></b> |                         |                                      |                                      |                                         |                                        |
| BS                                                                                               | 34.0±3.9 <sup>ab</sup>  | 26.1±3.9 <sup>a</sup>                | 44.5±3.9 <sup>b</sup>                | 48.4±3.9 <sup>b</sup>                   | 29.3±3.9 <sup>a</sup>                  |
| MS                                                                                               | 107.5±18.4 <sup>a</sup> | 103.7±15.3 <sup>a</sup>              | 136.6±12.1 <sup>a</sup>              | 118.5±14.3 <sup>a</sup>                 | 154.4±14.1 <sup>a</sup>                |
| M                                                                                                | 57.4±3.8 <sup>a</sup>   | 70.9±4.2 <sup>a</sup>                | 63.1±4.3 <sup>a</sup>                | 63.4±5.0 <sup>a</sup>                   | 55.8±4.2 <sup>a</sup>                  |

**Table S3. Quantification of relationship between chloroplast and mitochondrial size in leaf 7 of wild-type and transgenic lines. Related to Figures 3 and 4, Table 1.**

Planar chloroplast and mitochondria area/planar cell area of bundle sheath (BS), mestome sheath (MS) and mesophyll (M) cells of leaf 7 from transgenic Kitaake and wild-type (WT) plants grown at 300  $\mu\text{mol photons m}^{-2} \text{ s}^{-1}$ . Transgene transcript levels in each leaf at the time of harvesting are shown in Figure S2. Cell and organelle areas were calculated from TEM images; values are mean  $\pm$  s.e.m; n=45 i.e. 15 cells/individual, 3 individuals/construct. Individuals represent at least two independent transgenic events for each construct (see Table S1 for line numbers, and Figure S1 for transgene copy number in each line). Statistically distinct groups are indicated by superscripted letter within each row ( $p < 0.05$ ) by a Tukey's test of variance for normally distributed data (asterisk) and a Games-Howell test of variance for the rest of the data. Data correspond to Figures 3 & 4 and Table 1 in main text.

|       | WT        | <i>ZjPCK<sub>pro</sub>:<br/>ZmG2</i> | <i>ZmUBI<sub>pro</sub>:<br/>ZmG2</i> | <i>ZmPEPC<sub>pro</sub>:<br/>ZmGLK1</i> | <i>ZmUBI<sub>pro</sub>:<br/>ZmGLK1</i> |
|-------|-----------|--------------------------------------|--------------------------------------|-----------------------------------------|----------------------------------------|
| BS-M  | 35.6±11.1 | 51.1±8.0                             | 64.4±5.9*                            | 60.0±6.7*                               | 56.7±3.3*                              |
| BS-MS | 24.4±2.2  | 33.3±3.8                             | 44.4±11.8*                           | 42.2±9.7*                               | 28.9±2.2                               |

**Table S4. Relative frequency of plasmodesmata between cell-types in wild-type and transgenic lines. Related to Figure 4.**

Percentage of bundle sheath cells that had plasmodesmata in walls shared with adjacent mesophyll (BS-M) or mestome sheath cells (BS-MS) in leaf 7 of transgenic Kitaake and wild-type (WT) plants grown at 300  $\mu\text{mol photons m}^{-2} \text{s}^{-1}$ . Values were calculated from TEM images and are mean  $\pm$  s.e.m; n = 45 i.e. 15 cells/individual, 3 individuals/construct. Individuals represent at least two independent transgenic events for each construct (see Table S1 for line numbers, Figure S1 for transgene copy number in each line and Figure S2 for transgene transcript levels). Asterisks indicate lines with frequency of plasmodesmata significantly higher than WT, as measured by a General Linear Model.

| Species                                                 | Mesophyll: Vascular Sheath area ratio | Area per BS cells, $\mu\text{m}^2$ | Chloroplast area/ mesophyll cell area, % | Chloroplast area/ vascular sheath cell area, % | Mitochondria area/ mesophyll cell area, % | Mitochondria area/ vascular sheath cell area, % | Mesophyll tissue area/ total photosynthetic tissue area, % | Vascular sheath tissue area/ total photosynthetic tissue area, % | Photosynthetic tissue chloroplast in mesophyll, % | Photosynthetic tissue chloroplast in vascular sheath, % | Photosynthetic tissue mitochondria in mesophyll, % | Photosynthetic tissue mitochondria in vascular sheath, % |
|---------------------------------------------------------|---------------------------------------|------------------------------------|------------------------------------------|------------------------------------------------|-------------------------------------------|-------------------------------------------------|------------------------------------------------------------|------------------------------------------------------------------|---------------------------------------------------|---------------------------------------------------------|----------------------------------------------------|----------------------------------------------------------|
| <i>Oryza sativa</i> (WT)                                | 7.1±0.7                               | 90±5                               | 50.9±1.5                                 | BS: 5.3±0.7<br>MS: 0.4±0.2                     | 2.0±0.1                                   | BS: 0.5±0.2<br>MS: 1.4±0.2                      | 85.5±2.5                                                   | 14.5±2.5                                                         | 98.3±0.2                                          | 1.7±0.2                                                 | 93.3±0.6                                           | 6.7±0.6                                                  |
| <i>Oryza sativa</i> (ZjPCK <sub>pro</sub> :ZmG2)        | 4.7±0.5                               | 123±7                              | 50.3±1.8                                 | BS: 7.2±0.7<br>MS: 1.0±0.6                     | 3.3±0.3                                   | BS: 0.4±0.2<br>MS: 1.8±0.2                      | 82.4±1.1                                                   | 17.6±1.1                                                         | 96.9±0.5                                          | 3.1±0.5                                                 | 93.7±0.8                                           | 6.3±0.8                                                  |
| <i>Oryza sativa</i> (ZmUBI <sub>pro</sub> :ZmG2)        | 4.6±0.3                               | 102±7                              | 54.6±1.2                                 | BS: 12.9±0.7<br>MS: 16.3±1.9                   | 2.3±0.2                                   | BS: 2.9±0.2<br>MS: 2.3±0.2                      | 81.8±0.8                                                   | 18.2±0.8                                                         | 94.8±1.1                                          | 5.5±1.1                                                 | 79.2±4.3                                           | 20.8±4.3                                                 |
| <i>Oryza sativa</i> (ZmPEPC <sub>pro</sub> :ZmGLK1)     | 5.4±0.6                               | 103±5                              | 48.7±1.8                                 | BS: 9.3±0.7<br>MS: 1.3±0.3                     | 1.3±0.1                                   | BS: 0.5±0.2<br>MS: 1.5±0.2                      | 83.8±0.6                                                   | 16.2±0.6                                                         | 95.8±1.1                                          | 3.5±0.9                                                 | 87.8±1.1                                           | 12.2±1.1                                                 |
| <i>Oryza sativa</i> (ZmUBI <sub>pro</sub> :ZmGLK1)      | 7.2±2.9                               | 122±7                              | 48.4±2.1                                 | BS: 7.0±0.7<br>MS: 7.2±1.3                     | 1.9±0.1                                   | BS: 1.9±0.2<br>MS: 2.0±0.2                      | 82.9±0.7                                                   | 17.3±2.2                                                         | 96.9±0.7                                          | 4.3±1.1                                                 | 78.4±6.0                                           | 21.6±6.0                                                 |
| <i>Dicanthelium oligoanthes</i> , C <sub>3</sub> PACMAD | 5.7±0.5                               | 214±20                             | 26.9±1.8                                 | 3.8±0.4                                        | 0.28±0.03                                 | 0.50±0.05                                       | 84.8±0.9                                                   | 15.2±0.9                                                         | 97.5±0.1                                          | 2.5±0.1                                                 | 90.5±1.9                                           | 9.5±1.9                                                  |
| <i>Steinchisma laxum</i> , PK                           | 2.4±0.4                               | 582±107                            | 30.3±1.6                                 | 4.9±0.5                                        | 0.27±0.02                                 | 0.39±0.03                                       | 67.6±4.4                                                   | 32.4±4.4                                                         | 93.0±1.2                                          | 6.8±1.2                                                 | 76.1±0.8                                           | 23.9±0.8                                                 |
| <i>S. hians</i> , C <sub>2</sub>                        | 2.2±0.1                               | 402±30                             | 28.2±1.6                                 | 11.2±0.8                                       | 0.81±0.06                                 | 0.39±0.04                                       | 68.1±1.8                                                   | 31.9±1.8                                                         | 84.0±2.9                                          | 16.0±2.9                                                | 51.1±3.4                                           | 48.9±3.4                                                 |
| <i>Homolepis aturensis</i> , C <sub>2</sub>             | 2.1±0.2                               | 734±48                             | 17.7±1.2                                 | 8.3±0.7                                        | 0.73±0.06                                 | 0.30±0.06                                       | 66.4±1.6                                                   | 33.6±1.6                                                         | 80.8±2.8                                          | 19.2±2.8                                                | 44.2±2.9                                           | 55.8±2.9                                                 |
| <i>Panicum virgatum</i> , C <sub>4</sub> NAD-ME         | 1.8±0.1                               | 509±39                             | 12.3±0.9                                 | 14.6±1.1                                       | 0.74±0.07                                 | 0.09±0.02                                       | 63.2±2.1                                                   | 36.8±2.1                                                         | 53.6±3.0                                          | 46.4±3.0                                                | 17.2±1.4                                           | 82.8±1.4                                                 |
| <i>Setaria viridis</i> , C <sub>4</sub> NADP-ME         | 4.7±0.4                               | 204±15                             | 18.5±1.5                                 | 41.8±1.7                                       | 0.64±0.08                                 | 0.13±0.02                                       | 82.0±1.1                                                   | 18.0±1.1                                                         | 61.4±1.5                                          | 38.6±1.5                                                | 47.2±5.4                                           | 52.8±5.4                                                 |
| <i>Flaveria cranzii</i> , C <sub>3</sub>                | 17                                    | 892                                | 6.6±0.9                                  | 3.1±0.2                                        | 0.5±0.1                                   | 0.4±0.1                                         | 94.4                                                       | 5.6                                                              | 97.2                                              | 2.8                                                     | 95.5                                               | 4.5                                                      |
| <i>F. pringlei</i> , PK                                 | 8.4                                   | 746                                | 9.9±1.5                                  | 3.6±0.4                                        | 0.5±0.1                                   | 0.9±0.1                                         | 89.4                                                       | 10.6                                                             | 95.6                                              | 4.4                                                     | 82.4                                               | 17.6                                                     |
| <i>F. robusta</i> , PK                                  | 6.5                                   | 437                                | 11.7±2.1                                 | 6.9±3.3                                        | 0.4±0.1                                   | 1.2±0.1                                         | 86.7                                                       | 13.3                                                             | 91.5                                              | 8.5                                                     | 68.4                                               | 31.6                                                     |
| <i>F. sonorensis</i> , C <sub>2</sub> type I            | 2.7                                   | 965                                | 11.6±1.0                                 | 11.6±1.0                                       | 0.4±0.1                                   | 1.2±0.3                                         | 73                                                         | 27                                                               | 73.6                                              | 26.4                                                    | 47.4                                               | 52.6                                                     |
| <i>F. angustifolia</i> , C <sub>2</sub> type I          | 4.4                                   | 524                                | 11.0±1.4                                 | 10.2±0.8                                       | 0.5±0.1                                   | 2.1±0.2                                         | 81.5                                                       | 18.5                                                             | 83                                                | 17                                                      | 51.2                                               | 48.8                                                     |
| <i>F. anomala</i> , C <sub>2</sub> type II              | 3.3                                   | 801                                | 16.4±0.2                                 | 13.6±0.6                                       | NA                                        | NA                                              | 76.7                                                       | 23.3                                                             | 79.9                                              | 20.1                                                    | NA                                                 | NA                                                       |
| <i>F. linearis</i> , C <sub>2</sub>                     | 3.5                                   | 1138                               | 10.2±1.4                                 | 13.2±0.1                                       | NA                                        | NA                                              | 77.8                                                       | 22.2                                                             | 73                                                | 27                                                      | NA                                                 | NA                                                       |
| <i>F. floridana</i> , C <sub>2</sub> type II            | 3.8                                   | 826                                | 7.9±0.4                                  | 11.5±0.2                                       | NA                                        | NA                                              | 79.2                                                       | 20.8                                                             | 72.3                                              | 27.7                                                    | NA                                                 | NA                                                       |
| <i>F. ramosissima</i> , C <sub>2</sub> type II          | 2.7                                   | 947                                | 9.0±2.8                                  | 13.4±1.3                                       | NA                                        | NA                                              | 73                                                         | 27                                                               | 64.5                                              | 35.5                                                    | NA                                                 | NA                                                       |
| <i>F. brownii</i> , C <sub>4</sub> -like                | 1.4                                   | 855                                | 7.4±1.5                                  | 17.1±1.8                                       | NA                                        | NA                                              | 58.3                                                       | 41.7                                                             | 37.7                                              | 62.3                                                    | NA                                                 | NA                                                       |
| <i>F. vaginata</i> , C <sub>4</sub> -like               | 1.3                                   | 613                                | 14.6±1.3                                 | 36.5±1.0                                       | NA                                        | NA                                              | 56.5                                                       | 43.5                                                             | 34                                                | 66                                                      | NA                                                 | NA                                                       |
| <i>F. bisentis</i> , C <sub>4</sub>                     | 1.5                                   | 667                                | 13.7±1.0                                 | 31.0±1.4                                       | NA                                        | NA                                              | 60                                                         | 40                                                               | 39.9                                              | 60.1                                                    | NA                                                 | NA                                                       |
| <i>F. trinervia</i> , C <sub>4</sub>                    | 2.2                                   | 538                                | 15.0±0.5                                 | 36.7±3.4                                       | NA                                        | NA                                              | 68.8                                                       | 31.3                                                             | 49.3                                              | 50.7                                                    | NA                                                 | NA                                                       |

**Table S5. Percentage of chloroplasts and mitochondria invested in each cell-type in wild-type rice, *GLK* transgenic lines, various PACMAD grasses and *Flaveria*. Related to Figure 5.**

The % of organelles invested in each cell-type is quantified as the proportion of organellar area in that cell-type, as compared to the total organellar area across all photosynthetic tissues (see experimental design section of methods for full details). The total photosynthetic tissue area is defined as the sum of the planar leaf area covered by both mesophyll and vascular sheath cells. The total organellar area in all photosynthetic tissue is quantified as the sum of the fractional organelle area in each cell-type. Mean ± s.e.m., n = 3 for rice and each PACMAD grass. *Dicanthelium*, *Steinchisma* and *Homolepis* data are from [S4] *Flaveria* organellar data are from [S1,S2] and the values for cell type % in *Flaveria* species are extracted from M:BS ratios in Fig. 4 of [S3]. Data correspond to Figure 5 in main text and Figure S4.

| Primer name               | Sequence (5' to 3')                                |
|---------------------------|----------------------------------------------------|
| ZmG2-cloningF             | GGGGACAAGTTTGTACAAAAAAGCAGGCTATGCTTGAGGTGTCGACGCTG |
| ZmG2-cloningR             | GGGGACCACTTTGTACAAGAAAGCTGGGTTAGTATGTCATCCGGTGGCGC |
| ZmGLK1-cloningF           | GGGGACAAGTTTGTACAAAAAAGCAGGCTATGCTTGCAGTGTGCGCCGTC |
| ZmGLK1-cloningR           | GGGGACCACTTTGTACAAGAAAGCTGGGTTTCATCCACAAGCTTGGGCAC |
| pVec8F ( <i>UBI</i> pro)  | TTTAGCCCTGCCTTCATACG                               |
| pVec8R ( <i>nosT</i> )    | ATTGCCAAATGTTTGAACGA                               |
| pSC110F( <i>PEPC</i> pro) | ACGACTCCCCATCCCTATTT                               |
| pSC210F( <i>PCK</i> pro)  | CTGCTGCTGCTGCTCTCTC                                |
| pSC1/2/310-R              | AAGACCGGCAACAGGATTC                                |
| HPTFpr3                   | AAACTGTGATGGACGACACC                               |
| HPTRpr2                   | CTATCAGAGCTTGGTTGACG                               |
| ZmG2-F                    | CATGGTGGACGACAACCTC                                |
| ZmG2-R                    | CACATGTTTGTCTCCAACGAC                              |
| ZmGLK1-F                  | GGACCTGGATTTTCTGACTTCA                             |
| ZmGLK1-R                  | CACTCCCCTTTCCCTTCTTC                               |
| Actin-F                   | GGCACCACACCTTCTACAAT                               |
| Actin-R                   | CTCACACCATCACCAGAGT                                |
| OsGLK1-F                  | AGCTGCGAGATTTCTGCTC                                |
| OsGLK1-R                  | ATAGCTGCGTCGATGCTCTC                               |
| OsGLK2-F                  | AGGGGAGAGATTTTGGGATGC                              |
| OsGLK2-R                  | TTCCTTCACGTCTTCCTTGG                               |

**Table S6. PCR primers used. Related to STAR Methods.**

## SUPPLEMENTAL REFERENCES

- S1. Stata, M., Sage, T.L., Hoffmann, N., Covshoff, S., Ka-Shu Wong, G., and Sage, R.F. (2016). Mesophyll chloroplast investment in C<sub>3</sub>, C<sub>4</sub> and C<sub>2</sub> species of the genus *Flaveria*. *Plant Cell Physiol.* 57, 904–918.
- S2. Sage, T.L., Busch, F.A., Johnson, D.C., Friesen, P.C., Stinson, C.R., Stata, M., Sultmanis, S., Rahman, B.A., Rawsthorne, S., and Sage, R.F. (2013). Initial events during the evolution of C<sub>4</sub> photosynthesis in C<sub>3</sub> species of *Flaveria*. *Plant Physiol.* 163, 1266–1276.
- S3. McKown, A.D., and Dengler, N.G. (2007). Key innovations in the evolution of Kranz anatomy and C<sub>4</sub> vein pattern in *Flaveria* (Asteraceae). *Am. J. Bot.* 94, 382–399.
- S4. Khoshravesh, R., Stinson, C.R., Stata, M., Busch, F.A., Sage, R.F., Ludwig, M., and Sage, T.L. (2016). C<sub>3</sub>–C<sub>4</sub> intermediacy in grasses: organelle enrichment and distribution, glycine decarboxylase expression, and the rise of C<sub>2</sub> photosynthesis. *J. Exp. Bot.* 67, 3065–3078.
